1 **Divergent gene expression responses in two Baltic Sea heterotrophic model**  
2 **bacteria to dinoflagellate dissolved organic matter**

3 Christofer M.G. Osbeck<sup>1</sup>, Daniel Lundin<sup>1</sup>, Camilla Karlsson<sup>1</sup>, Jonna E. Teikari<sup>2</sup>, Mary Ann  
4 Moran<sup>3</sup>, Jarone Pinhassi<sup>1,\*</sup>

5 <sup>1</sup>Centre for Ecology and Evolution in Microbial Model Systems, EEMiS, Linnaeus University,  
6 Kalmar, Sweden.

7 <sup>2</sup>Department of Microbiology, University of Helsinki, Helsinki, Finland

8 <sup>3</sup>Department of Marine Sciences, University of Georgia, Athens, Georgia, USA.

9

10 \*Corresponding author email: [jarone.pinhassi@lnu.se](mailto:jarone.pinhassi@lnu.se)

11

12 **Key words:** Marine bacteria; bacterioplankton; microbial ecology; genomics; transcriptomics;  
13 mRNA; RNAseq; phytoplankton exudation; ecological traits.

14 **Short title:** Marine bacteria responses to phytoplankton dissolved organic matter.

15

16

17 **Abstract**

18 Phytoplankton release massive amounts of dissolved organic matter (DOM) into the water column  
19 during recurring blooms in coastal waters and inland seas. The released DOM encompasses a  
20 complex mixture of both known and unknown compounds, and is a rich nutrient source for  
21 heterotrophic bacteria. The metabolic activity of bacteria during and after phytoplankton blooms can  
22 hence be expected to reflect the characteristics of the released DOM. We therefore investigated if  
23 bacterioplankton could be used as “living sensors” of phytoplankton DOM quantity and/or quality,  
24 by applying gene expression analyses to identify bacterial metabolisms induced by DOM. We used  
25 transcriptional analysis of two Baltic Sea bacterial isolates (*Polaribacter* sp. BAL334  
26 [Flavobacteriia] and *Brevundimonas* sp. BAL450 [Alphaproteobacteria]) growing with DOM from  
27 axenic cultures of the dinoflagellate *Prorocentrum minimum*. We observed pronounced differences  
28 between the two bacteria both in bacterial growth and the expressed metabolic pathways in cultures  
29 exposed to dinoflagellate DOM compared with controls. Differences in metabolic responses  
30 between the two isolates were caused both by differences in gene repertoire between them (e.g. in  
31 the SEED categories for membrane transport, motility and photoheterotrophy) and the regulation of  
32 expression (e.g. fatty acid metabolism), emphasizing the importance of separating the responses of  
33 different taxa in analyses of community sequence data. Similarities between the bacteria included  
34 substantially increased expression of genes for Ton and Tol transport systems in both isolates, which  
35 are commonly associated with uptake of complex organic molecules. *Polaribacter* sp. BAL334  
36 showed stronger metabolic responses to DOM harvested from exponential than stationary phase  
37 dinoflagellates (128 compared to 26 differentially expressed genes), whereas *Brevundimonas* sp.  
38 BAL450 responded more to the DOM from stationary than exponential phase dinoflagellates (33  
39 compared to 6 differentially expressed genes). These findings suggest that shifts in bacterial  
40 metabolisms during different phases of phytoplankton blooms can be detected in individual bacterial  
41 species and can provide insights into their involvement in DOM transformations.

## 42 **Introduction**

43 Dissolved organic matter (DOM) in seawater is estimated to represent one of the largest reservoirs  
44 of organic carbon on earth (1). It consists of a complex mixture of compounds of different molecular  
45 weights, solubility and volatility (2) and is traditionally classified according to bioavailability (i.e.  
46 labile, semi-labile and refractory) with turnover times ranging from minutes to thousands of years  
47 (3). DOM released by living and dying phytoplankton is an important source of organic carbon  
48 available for heterotrophic bacteria (4). Up to 50% of the carbon fixed by primary producers in  
49 marine and limnic ecosystems – bacterial and eukaryotic phytoplankton as well as multicellular  
50 algae – is turned over by bacterioplankton in the microbial loop (5). This way, organic carbon is  
51 degraded and transformed by the microbial community, with most eventually respired as CO<sub>2</sub>. This  
52 carbon turnover occurs at a rate that is orders of magnitude higher in the sea than in terrestrial  
53 ecosystems (6, 7), particularly so in coastal environments and inland seas where nutrient  
54 concentrations do not limit microbial activities to the same extent as in the open ocean. Given the  
55 tight linkages between phytoplankton and bacteria, it is desirable to learn to what extent and by  
56 which mechanisms the metabolic activity of heterotrophic bacteria regulate carbon and nutrient  
57 cycling through the microbial loop.

58 Monitoring the actual rates of the plethora of metabolic pathways active in microbial communities  
59 directly *in situ* is currently not feasible, but nucleotide sequencing-based methods, in particular  
60 metatranscriptomics, can indicate which microbial metabolisms are actively transcribed.  
61 Metatranscriptomics has hence become a widely used tool to provide detailed insights into the  
62 genetic underpinnings of metabolic responses within communities both in natural environments and  
63 controlled experiments (8-11). The complexity of gene regulation observed in communities  
64 consisting of many thousands of individual populations is, however, daunting. For the purpose of  
65 eventually using transcript profiling as a proxy for metabolic activity in complex natural  
66 communities, zooming in to compare gene expression pattern in isolates of environmentally relevant  
67 microbial taxa could be useful.

68 With the aim of charting the possibility of using transcriptional activity of bacterial isolates as living  
69 sensors for the flow of nutrients in the ecosystem, we exposed two Baltic Sea model bacteria to  
70 DOM derived from axenic cultures of *Prorocentrum minimum*, a dinoflagellate that forms major  
71 blooms in the spring and autumn in the Baltic Sea. The bacterial isolates – *Polaribacter* sp. strain  
72 BAL334 (*Flavobacteriaceae*, *Bacteroidetes*) and *Brevundimonas* sp. strain BAL450  
73 (*Caulobacteraceae*, *Alphaproteobacteria*) – were selected to compare responses of bacteria with  
74 different evolutionary histories. Furthermore, since previous studies of phytoplankton extracellular  
75 DOM release have suggested that phytoplankton secrete different compounds during early and late  
76 growth phases (12-16), the DOM was harvested both from dinoflagellates growing actively and in  
77 stationary phase. This allowed characterization of potential differences in bacterial responses to  
78 DOM released during exponential and senescence phases of phytoplankton blooms.

79

## 80 **Materials and Methods**

### 81 *Cultivation of axenic Prorocentrum minimum*

82 An axenic culture of the dinoflagellate *Prorocentrum minimum* strain CCMP1329 was obtained  
83 from the Provasoli-Guillard National Center of Marine Algae and Microbiota (CCMP;  
84 <https://ncma.bigelow.org/>). 5 mL of inoculum of *P. minimum* CCMP1329 was transferred and  
85 cultivated in axenic conditions in 6 replicates using acid-washed Erlenmeyer flasks (2 L) containing  
86 1.3 L of L1 medium (17), prepared using 0.2  $\mu\text{m}$  membrane filters (Supor®, Pall Corporation) and  
87 artificial seawater (30 practical salinity units, prepared from Sea Salts; Sigma). The cultures were  
88 placed in 20°C with photosynthetically active radiation (PAR) of 83 – 101  $\mu\text{mol photon m}^{-2} \text{s}^{-1}$  in  
89 light:dark cycles of 13:11 h and bubbled with filtered air provided by an inhouse air system. To  
90 follow the growth of the cultures, chlorophyll *a* concentrations were measured regularly by  
91 collecting 1 mL of culture on 25 mm glass microfiber filters (GF/C, Glass Microfiber Binder Free,  
92 Whatman), followed by chlorophyll *a* ethanol extraction according to (18).

93 *Collection of DOM*

94 DOM from *P. minimum* CCMP1329 was collected from three of the cultures in the exponential  
95 growth phase (~15 days after inoculation) and from two of the cultures in stationary phase (~31  
96 days), hereafter referred to as DOM\_exp and DOM\_sta, respectively. DOM from the exponential  
97 growth phase was retrieved as follows. Phytoplankton cells were gently removed by first filtering  
98 through an acid-washed 3.0 µm polycarbonate filter (GSV, Life Science) and then through an acid-  
99 washed 0.22 µm polycarbonate filter (GSV, Life Science), using a Sterifil 47 mm filter holder  
100 (Merck Millipore). DOM collected in stationary growth phase was obtained by first centrifuging the  
101 cultures in acid-washed 50 mL Falcon tubes for 10 min at 3000 g (to prevent filters from clogging);  
102 the supernatant was then filtered through an acid-washed 0.22 µm polycarbonate filter (GSV, Life  
103 Science) using a Sterifil 47 mm filter holder (Merck Millipore). The flow-through liquid was  
104 transferred into an acid-washed 10 L polycarbonate (PC) bottle and mixed before samples for  
105 dissolved organic carbon (DOC) concentration and microscope samples were taken (see below for  
106 detailed information of the sampling procedure). Finally, the DOM was aliquoted into 1 L acid-  
107 washed PC bottles and stored at -80°C until further proceedings.

108 *Bacterial isolates and culture conditions*

109 The flavobacterium *Polaribacter* sp. strain BAL334 (hereafter referred to as *Polaribacter* BAL334)  
110 and alphaproteobacterium *Brevundimonas* sp. strain BAL450 (hereafter referred to as  
111 *Brevundimonas* BAL450) were isolated from surface water (2 m depth) at the Linnaeus Microbial  
112 Observatory (LMO) in the Baltic Sea (N 56° 55.8540', E 17° 3.6420') during 2012. Seawater was  
113 spread on Baltic Zobell agar plates containing a mixture of 5 g bacto peptone, 1 g yeast extract and  
114 15 g bacto agar per L of sterile Baltic Sea water (i.e. a mix of 750 ml seawater and 250 ml MilliQ  
115 water). Bacterial colonies were transferred into 1 mL of Baltic Zobell medium (i.e. mixture of 5 g  
116 bacto peptone and 1 g yeast extract per L of sterile Baltic Seawater) and preserved in glycerol (25%,  
117 final concentration) in -80°C.

118 *DNA extraction and genome sequencing*

119 To identify the bacteria, DNA from the isolates were extracted using the E.Z.N.A. Tissue DNA kit  
120 (Omega bio-tek, USA) following the manufacturer's protocol for extraction of cultured cells in  
121 suspension. For identification of the isolates, bacterial 16S rRNA genes were PCR amplified using  
122 the primers 27F and 1492R at a final concentration of 10 picomole per  $\mu\text{l}$  with the following PCR  
123 thermal cycling program: 95°C for 2 min; 30 cycles of 95°C for 30 s, 50°C for 30 s, and 72°C for  
124 45 s; and 72°C for 7 min. E.Z.N.A. Cycle-Pure Kit (Omega bio-tek, USA) were used for cleaning  
125 the PCR product following the manufacturer's spin protocol instruction. Samples were sent for  
126 Sanger sequencing at Macrogen Europe, Amsterdam, Netherlands. The partial 16S rRNA gene  
127 sequences have been deposited in GenBank with the following accession numbers: KM586879  
128 (*Polaribacter* BAL334) and KM586934 (*Brevundimonas* BAL450).

129 Genome sequences from the isolates *Polaribacter* BAL334 and *Brevundimonas* BAL450 were  
130 obtained by sequencing the extracted genomic DNA using the Illumina HiSeq 2500 system (PE  
131 2x125bp) at SciLifeLab, Solna, Sweden. The quality of sequences was checked with FastQC  
132 (version 0.11.5) (19) and MultiQC (version 1.4) (20), adaptors were removed with cutadapt (version  
133 1.12) (21) and Sickle (version 1.33) (22) was used to trim sequences based on quality score.  
134 Assembly was performed using Megahit (version 1.1.2) (23) and annotation with the Rapid  
135 Annotation using Subsystem Technology (RAST) server (24, 25). The genomes are available in the  
136 RAST database SEED viewer (<https://rast.nmpdr.org/seedviewer.cgi>) with identities  
137 6666666.325781  
138 (<https://rast.nmpdr.org/seedviewer.cgi?page=Organism&organism=6666666.325781>) and  
139 6666666.325780  
140 (<https://rast.nmpdr.org/seedviewer.cgi?page=Organism&organism=6666666.325780>) for  
141 *Polaribacter* BAL334 and *Brevundimonas* BAL450, respectively, using the guest account (user  
142 login “guest”, password “guest”).

143 *Experimental setup and spiking of DOM*

144 Bacterial isolates were grown on Baltic Zobell agar plates for 3-4 days at room temperature after  
145 being transferred from the -80°C freezer. Subsequently, they were inoculated into an acid-washed  
146 100-mL glass bottle containing 20 mL Baltic Zobell medium, and were allowed to grow for 28 hours  
147 (*Polaribacter* BAL334) and 54 hours (*Brevundimonas* BAL450) on a Unimax 2010 orbital shaker  
148 (Heidolph) at 120 rpm. 2 mL of bacterial culture *Polaribacter* BAL334 (reaching an optical density  
149 [OD<sub>600</sub>] of 0.39) and 0.5 mL of bacterial culture *Brevundimonas* BAL450 (reaching OD<sub>600</sub> of 0.57)  
150 were transferred to acid-washed 2 (L) glass bottles containing 300 mL fresh Baltic Zobell medium.  
151 *Polaribacter* BAL334 was grown into early stationary phase at 80 rpm (38 hours; and OD<sub>600</sub> 0.20)  
152 and *Brevundimonas* BAL450 bacterial cultures was grown into early stationary phase (40 hours;  
153 OD<sub>600</sub> 1.3) at 120 rpm. To reduce nutrient concentrations and adapt bacterial cells to starvation,  
154 bacterial cells were centrifuged at 4000 rpm for 7 min, supernatants were discarded and cell pellets  
155 were washed by adding 1 volume of sterile artificial Baltic seawater (7 PSU, prepared from Sea  
156 Salts; Sigma). Cells were resuspended in artificial Baltic seawater and the procedure was repeated  
157 twice more.

158 To start the experiment, 30 mL (*Polaribacter* BAL334) and 14.5 mL (*Brevundimonas* BAL450) of  
159 resuspended bacterial cells were divided into each of nine acid-washed (1 L) glass bottles containing  
160 700 mL artificial seawater (7 practical salinity units, prepared from Sea Salts; Sigma). The different  
161 volumes were to start the experiment with a similar bacterial biomass, and was based on OD  
162 measures in the washed cells (see previous paragraph). Subsequently, after 1.5 hours, three of the  
163 bottles were spiked with 67 mL DOM<sub>exp</sub> and three with 14 mL DOM<sub>sta</sub> to obtain an enrichment  
164 with DOC corresponding to ~50 µM carbon (final concentration). To minimize potential effects  
165 from the medium used for culturing *P. minimum* between the treatments, 53 mL of L1 medium were  
166 added to the DOM<sub>sta</sub> bottles. Three bottles serving as controls were spiked with 67 mL of L1  
167 medium. Samples for determination of DOC concentrations and bacterial abundances were taken as  
168 described below.

169 *Determination of DOC concentrations, bacterial abundance, OD and purity of cultures using*  
170 *microscopy and cultivation*

171 Samples for DOC concentrations were collected 1 hour after DOM spiking by filtering 30 mL of  
172 sample through 0.2  $\mu\text{m}$  acrodisc supor syringe filters 32 mm, into a 60 mL TC flask (Sarstedt) using  
173 a 50 ml plastic syringe (NORM-JECT). Samples were then acidified by addition of 448  $\mu\text{l}$  1.2 M  
174 HCl. DOC concentrations were calculated as non purgeable organic carbon (using high temperature  
175 catalytic oxidation followed by NDIR detection of the gaseous  $\text{CO}_2$ ), analyzed on the high-  
176 temperature carbon analyzer Shimadzu TOC-5000 at Umeå Marine Science Centre, Umeå, Sweden.  
177 Bacterial abundance (BA) samples were taken in triplicates from each replicate 1 hour after DOM  
178 spiking, by fixing the sample with paraformaldehyde at a final concentration of 1%. Samples were  
179 then frozen at  $-80^\circ\text{C}$  until determined by using the flow cytometer Cube 8 (CyFlow®) according to  
180 protocol in (26). Optical density at 600 nanometer ( $\text{OD}_{600}$ ) was measured with a Beckman DU®640  
181 spectrophotometer. To ensure axenic conditions (i.e. exclusion of bacterial contamination), 1 mL of  
182 algae cultures and samples from experiments were fixed with 1% paraformaldehyde, stained with  
183 0.02% SYBR gold (final concentration) and filtered onto 0.2  $\mu\text{m}$ , 25 mm black polycarbonate filters  
184 (Millipore). The filters were analyzed by epifluorescence microscope observation before and after  
185 the cultivations/experiments. Additionally, aliquots from bacterial and phytoplankton cultures were  
186 spread on Zobell agar plates for investigation of potential contamination.

187 *RNA sampling, extraction and sequencing*

188 One hour after DOM spiking, seawater samples for RNA were fixed by addition of an ethanol:phenol  
189 mix (5 % phenol in absolute ethanol) in a 10:1 proportion (27). The fixed samples were then filtered  
190 through Durapore 0.2  $\mu\text{m}$ , 47-mm membrane filters GV (Merck Millipore). Filters were folded and  
191 transferred into clean nucleotide-free collection tubes and stored at  $-80^\circ\text{C}$  until further procedure.  
192 Extraction of RNA was performed using the RNeasy mini kit (Qiagen). Briefly, bacterial cells were  
193 lysed by cutting membrane filters into smaller pieces and placing them in nucleic acid free microfuge  
194 tubes containing RLT Buffer (with added  $\beta$ -Mercaptoethanol 1:100) and 1.5 gram 200  $\mu\text{m}$  Low



195 Binding Zirconium Beads (OPS diagnostics, USA). Thereafter, cell lysis, RNA purification, on  
196 column DNase digestion and RNA elution were performed following the manufacturer's  
197 instructions. Total RNA was DNase treated using the TURBO DNA-free Kit (ThermoFisher  
198 Scientific) and quality checked on agarose gel. Ribosomal RNA was depleted using RiboMinus  
199 Transcriptome Isolation Kit and RiboMinus Concentration Module (ThermoFisher Scientific) and  
200 mRNA was amplified using the MeassageAmp II-Bacteria RNA Amplification Kit (ThermoFisher  
201 Scientific) according to manufacturer's instructions. RNA sequencing was done at the at SciLifeLab,  
202 Solna, Sweden. Raw sequence reads are available at NCBI's Sequence Read Archive under the  
203 BioProject PRJNA678611 (<https://www.ncbi.nlm.nih.gov/bioproject/PRJNA678611>).

#### 204 *Bioinformatics and statistical analysis*

205 RNA sequencing was done at the at SciLifeLab, Solna, Sweden, and RNA sequence reads were  
206 quality trimmed with Sickle (version 1.33) (22) and mapped to the genomes with Bowtie 2 (28).  
207 This resulted in between 92,655 and 329,457 mRNA sequence reads per sample. EdgeR (29) was  
208 used to determine significantly differentially expressed genes (false discovery rate <5%) between  
209 treatments and controls. EdgeR was also used to retrieve normalized counts per million (CPM)  
210 estimates. Genes with an expression of less than five sequence reads were not included in the  
211 analyses.

212

## 213 **Results**

### 214 *Growth of Prorocentrum minimum*

215 The dinoflagellate *Prorocentrum minimum* was grown as the DOM source for the experiments. It  
216 followed a sigmoid growth curve with a lag phase of about 10 d. Thereafter, it entered an exponential  
217 growth phase. DOM was collected during active growth (day 15) at a chlorophyll *a* concentration  
218 of  $629 \pm 35 \mu\text{g/L}$ . After 31 d the samples for stationary phase DOM were retrieved at chl *a*  
219 concentration of  $2436 \pm 130 \mu\text{g/L}$  (**Fig. 1**).

220 **Figure 1. Growth of axenic *P. minimum* cultures in L1 medium for collection of**  
221 **dissolved organic matter from different growth phases.** Red line denotes growth of  
222 cultures harvested for DOM in exponential phase, and blue line shows growth of cultures  
223 harvested in stationary phase. Chlorophyll *a* concentrations were monitored as a proxy for  
224 biomass. Error bars denote the standard deviations of triplicates for exponential phase  
225 cultures and duplicates for stationary phase; when not visible, error bars are within symbols.

226

### 227 *Bacterial abundance*

228 In *Polaribacter* BAL334 cultures spiked with DOM from exponential and stationary phase  
229 dinoflagellate cultures, bacterial abundance reached  $6.6 \pm 0.6$  and  $6.4 \pm 0.6 \times 10^6$  cells ml<sup>-1</sup> (mean  $\pm$   
230 standard deviations, n=3), respectively. This was nearly a doubling compared to the control cultures  
231 where  $3.8 \pm 0.7 \times 10^6$  cells ml<sup>-1</sup> were recorded. Bacterial abundance in the *Brevundimonas* BAL450  
232 cultures spiked with exponential phase DOM increased to  $3.7 \pm 0.4 \times 10^6$  cells ml<sup>-1</sup>, and further  
233 increased to  $4.6 \pm 0.4 \times 10^6$  cells ml<sup>-1</sup> with stationary phase DOM. Control culture cell abundance  
234 was  $1.7 \pm 0.4 \times 10^6$  cells ml<sup>-1</sup>.

### 235 *Brief description of the Polaribacter sp. BAL334 and the Brevundimonas sp. BAL450 genomes*

236 *Polaribacter* sp. BAL334 (Bacteroidetes) and *Brevundimonas* sp. BAL450 (Alphaproteobacteria)  
237 have similar genome sizes at ~3.3 Gb and ~3.2 Gb, respectively. The *Polaribacter* sp. BAL334  
238 genome contains 2880 putative open reading frames (ORFs), of which 1021 (35.5%) have a SEED  
239 annotation, whereas 757 (26.3%) have a functional annotation but were not represented in SEED.  
240 The remaining 1102 ORFs (38.2%) were annotated as hypothetical proteins. The *Brevundimonas*  
241 sp. BAL450 genome encodes 3001 ORFs. Of these, 1269 (42.3%) have a SEED annotation, and 732  
242 (24.4%) were not included in SEED but were functionally annotated; the remaining 1000 ORFs  
243 (33.3%) were annotated as hypothetical proteins.

244 As expected due to their role in central metabolism, dominant SEED categories (the highest level in  
245 the SEED hierarchy) in the genomes of both isolates were *Amino Acids and Derivatives* (up to 300  
246 genes), *Carbohydrates*, *Protein Metabolism*, and the category *Cofactors, Vitamins, Prosthetic*  
247 *groups, Pigments* (**Fig. 2A**). Although the genome sizes of the two bacteria was comparable,  
248 *Polaribacter* BAL334 had a higher number of genomically encoded genes devoted to the categories  
249 *Carbohydrates* (222 genes, compared to 191 in *Brevundimonas* BAL450) and *Sulfur metabolism*  
250 (37 versus 18 genes) and *Photosynthesis*; the latter reflecting that only *Polaribacter* BAL334 has  
251 the proteorhodopsin gene encoded in its genome. The category *Motility and Chemotaxis* was only  
252 found in *Brevundimonas* BAL450 (84 genes), reflecting the lack of flagellar motility in *Polaribacter*  
253 BAL334 (**Fig. 2A**).

254 **Figure 2. Comparison of number of genes in genomes and the relative expression levels**  
255 **in the two studied bacteria exposed to distinct DOM.** A) Number of genomically encoded  
256 genes in top level SEED categories. B) Relative gene expression responses to enrichment  
257 with DOM collected from axenic exponential and stationary phase dinoflagellate cultures,  
258 and to control enrichments with only dinoflagellate L1 medium. “BAL334” and “BAL450”  
259 refers to *Polaribacter* BAL334 and *Brevundimonas* BAL450, respectively. Error bars in 2B  
260 indicate standard deviations for triplicates per treatment.

261

#### 262 *Messenger RNA sequencing outcome*

263 Sequenced bacterial mRNAs sampled 1 h after addition to phytoplankton DOC treatments mapped  
264 to 2742 ORFs in *Polaribacter* BAL334 and 2984 ORFs in *Brevundimonas* BAL450, representing  
265 95% and 99% of putative protein coding genes in the genomes of the two isolates, respectively. The  
266 SEED annotated genes (with full functional hierarchies allowing higher level metabolic analyses;  
267 995 and 1228 respectively in *Polaribacter* BAL334 and *Brevundimonas* BAL450), attracted 36-  
268 38% of the mRNA reads in *Polaribacter* BAL334 and 56-58% of the reads in *Brevundimonas*

269 BAL450. The higher SEED annotation levels in the transcriptome of *Brevundimonas* BAL450 most  
270 likely reflects that knowledge of Proteobacteria genetics is generally higher than for Bacteroidetes.

### 271 *Overview of transcriptional differences between the two bacteria*

272 Upon comparison of the two isolates, it was interesting to note that in the category *Membrane*  
273 *Transport*, both the number of genes in the genome (**Fig. 2A**) and the relative expression level (**Fig.**  
274 **2B**) were threefold higher in *Brevundimonas* BAL450 than in *Polaribacter* BAL334 (105 genes  
275 versus 31 expressed genes at ~97,000 versus ~26,000 CPM). *Brevundimonas* BAL450 also had  
276 higher expression than *Polaribacter* BAL334 in the two categories *Nitrogen Metabolism* and  
277 *Phosphorus Metabolism* (**Fig. 2B**). Despite both genomes encoding around 90 genes in the category  
278 *Fatty Acids, Lipids, and Isoprenoids* (**Fig. 2A**), expression in this category was approximately 3-  
279 fold higher in *Polaribacter* BAL334 than in *Brevundimonas* BAL450 (~52,000 versus ~15,000  
280 CPM) (**Fig. 2B**).

281 The major differences between the isolates in expression levels of genes in the SEED categories  
282 *Membrane Transport* and *Fatty Acids, Lipids, and Isoprenoids* led us to do a closer inspection of  
283 the genes involved. In *Membrane Transport*, we identified many more expressed genes in  
284 *Brevundimonas* BAL450 (64 paralog groups) than in *Polaribacter* BAL334 (18 paralog groups).  
285 Moreover, these genes were distributed in a broader variety of transporter subsystems (the second  
286 level in the SEED hierarchy; roughly corresponding to “pathways” in other annotation databases) in  
287 *Brevundimonas* BAL450 (**Fig. 3**). In both isolates, transporter expression was dominated by the *Ton*  
288 *and Tol transport* subsystem, both in relative expression levels and the number of expressed genes.  
289 *TRAP transporters* and *Uni-, Sym- and Antiporters* were well represented in *Brevundimonas*  
290 BAL450 but were absent from *Polaribacter* BAL334 (**Fig. 3**).

291 **Figure 3. Comparison of relative expression levels of genes in the SEED category**  
292 ***Membrane Transport* in the two studied bacteria.** Colors of circles denote transporter  
293 types. The size of circles represents the number of paralogs (defined as ORFs with the same

294 name) in each of the genomes of the two bacteria. Y-axes shows the expression in counts per  
295 million (CPM) for the DOM treatments and the controls.

296

297 Regarding the category *Fatty Acids, Lipids, and Isoprenoids*, the higher expression in *Polaribacter*  
298 BAL334 compared to *Brevundimonas* BAL450 was primarily due to differences in *Fatty Acid*  
299 *metabolism* and *Polyhydroxybutyrate metabolism* (PHB) subsystems (**Fig. 4**). Both of the  
300 subsystems contained few expressed genes (five in both subsystems in *Polaribacter* BAL334; 11  
301 and 15, respectively, in *Brevundimonas* BAL450; **Fig. 4**). In fact, two of the three most abundantly  
302 expressed genes in this category (*3-hydroxyacyl-CoA dehydrogenase* and *3-ketoacyl-CoA thiolase*)  
303 are shared between the subsystems, while the third (*Acetyl-CoA acetyltransferase*) occurred only in  
304 PHB. Still, we observed large differences between the isolates in the expression of these genes, with  
305 higher levels in *Polaribacter* BAL334 (**Table S1**). Moreover, *Polaribacter* BAL334 had  
306 substantially higher levels of expression of genes involved in isoprenoid synthesis (**Fig. 4**), in line  
307 with isoprenoids being precursors for carotenoids, which are likely responsible for the vividly orange  
308 color of *Polaribacter* BAL334 colonies.

309 **Figure 4.** Analysis of gene expression in SEED subsystems of the *Fatty Acid, Lipids and*  
310 *Isoprenoids* category. Colors of circles denote SEED subcategories. The size of symbols  
311 represents the number of genes expressed in each subsystem. Y-axes shows the expression  
312 in counts per million (CPM) for the two DOM treatments and the controls.

313

314 *Significantly differentially expressed genes*

315 To determine which expressed genes were significantly more (denoted “up”) or less (denoted  
316 “down”) abundant in the transcriptomes of the DOM-enriched samples than in controls, we  
317 performed a statistical analysis using EdgeR (29). The analysis was partitioned into four contrasts,

318 considering each of the bacterial isolates and each of the DOM pools from the dinoflagellate relative  
319 to the control samples that did not receive any DOM. *Polaribacter* BAL334 enriched with DOM  
320 from exponential phase dinoflagellates compared to the control (hereafter, BAL334Exp-Con  
321 contrast) contained by far the highest number of differentially expressed genes (total of 128 genes;  
322 106 up and 22 down; *false discovery rate* <5%) (**Fig. 5**). The treatment with DOM from stationary  
323 phase dinoflagellates (hereafter, *Polaribacter* BAL334Sta-Con) resulted in many fewer  
324 differentially expressed genes (24 genes up and two down). In *Brevundimonas* BAL450, on the other  
325 hand, it was the DOM from stationary phase dinoflagellates (hereafter, *Brevundimonas* BAL450Sta-  
326 Con) that induced more differentially expressed genes (23 genes up and ten down) than the  
327 exponential phase DOM (hereafter, *Brevundimonas* BAL450Exp-Con): four genes up and two down  
328 (**Fig. 5**). None of the significantly differentially expressed genes were shared between *Polaribacter*  
329 BAL334 and *Brevundimonas* BAL450 (**Table S2**). In both bacterial isolates the majority of  
330 expressed genes were not included in any SEED category (denoted “Not in SEED” in **Fig. 5**).

331 **Figure 5.** Influence of DOM from different growth phases of the dinoflagellate  
332 *Prorocentrum minimum* on statistically significant differences in gene expression between  
333 the two marine bacteria. Transcripts were defined as statistically significantly differentially  
334 abundant based on EdgeR analyses with an FDR  $\leq 0.05$ . Each circle represents one gene and  
335 the circle size shows the calculated expression in logCPM; note that a gene can occur in more  
336 than one SEED category. Genes with significantly lower expression in controls compared to  
337 treatments are indicated with negative logarithmic fold change (logFC) values. BAL334Exp-  
338 Con and BAL334Sta-Con refers to *Polaribacter* BAL334 with DOM from exponential (Exp)  
339 and stationary (Sta) phase DOM compared to controls (Con). BAL450Exp-Con and  
340 BAL450Sta-Con refers to *Brevundimonas* BAL450 with DOM from exponential (Exp) and  
341 stationary (Sta) phase DOM compared to controls (Con).

342

343 Out of the 128 differentially expressed genes, 104 genes were unique to the *Polaribacter* BAL334  
344 exponential phase. Twelve SEED subsystems had at least two differentially expressed genes  
345 compared to the control (**Fig. 6; Table S2**). Of these, only the *Proteorhodopsin* subsystem (in SEED  
346 category *Photosynthesis*) had genes with relative expression levels that were significantly higher in  
347 the controls (seen as negative value of differentially expressed genes in **Fig. 6**), one proteorhodopsin  
348 gene and one phytoene dehydrogenase (the latter being involved in the synthesis of the rhodopsin  
349 chromophore retinal). Both were moderately abundant with logCPM values of 11.1 and 9.6,  
350 respectively (i.e. ~0.2% and 0.08% of total transcripts).

351 Furthermore, the *Polaribacter* BAL334Exp-Con contrast contained five subsystems in the  
352 *Carbohydrates* category with at least two genes that increased in expression in the treated samples,  
353 three of which were also highly expressed: *Trehalose Uptake and Utilization*, *Trehalose*  
354 *Biosynthesis*, and *Cellulosome* (**Fig. 6; Table S2**). Several of the more abundant genes in these  
355 subsystems encode enzymes involved in binding of starch (SusC; a component of the polysaccharide  
356 utilization loci [PULs] widespread in Bacteroidetes (30), and eight genes involved in starch  
357 degradation to trehalose/maltose and the potential modification of these sugars: for example, two  
358 alpha-amylase genes the two enzymes in maltose to glucose degradation (maltose/trehalose  
359 phosphorylase (**Fig. 6; Table S2**). This suggests that starch released by the dinoflagellate was an  
360 important substrate fueling growth of *Polaribacter* BAL334.

361 Finally, the *Polaribacter* BAL334Exp-Con contrast included the *Amino Acids and Derivatives*  
362 category, the *Branched-Chain Amino Acid Biosynthesis* subsystem which contained six genes  
363 involved in isoleucine synthesis. In the *DNA Metabolism* category, three type I restriction-  
364 modification system genes were detected, shared by two subsystems plus a type III restriction-  
365 modification system gene found only in the *Restriction-Modification System* subsystem (**Fig. 6;**  
366 **Table S2**). Only two significantly differentially abundant genes were unique to the contrast

367 *Polaribacter* BAL334Sta-Con, encoding 2-isopropylmalate synthase (*Amino Acids and Derivatives*)  
368 and a SusC paralog, the outer membrane protein involved in starch binding (*Carbohydrates*).  
369 Among the 32 significant genes that were unique in the *Brevundimonas* BAL450Sta-Con contrast,  
370 it is interesting to note the *Ferric siderophore transport system, periplasmic binding protein TonB*  
371 (**Table S2**). The Ton and Tol transport system (*Membrane Transport*) was the only subsystem in  
372 *Brevundimonas* BAL450 that contained at least two differentially expressed genes (**Fig. 6; Table**  
373 **S2**). Two of the three genes were annotated as *TonB-dependent receptors*, and were shared between  
374 the exponential and stationary phase DOM contrasts with controls. In contrast, the *N-*  
375 *acetylglucosamine-regulated TonB-dependent outer membrane receptor* was unique to the  
376 BAL450Exp-Con contrast (**Fig. 6; Table S2**).

377 **Figure 6.** Subsystems in *Polaribacter* BAL334Exp-Con containing at least two significantly  
378 differentially expressed genes. SEED subsystem is shown on Y-axis and SEED category is  
379 shown in each plot title. The X-axis shows the number of genes whose expression is  
380 significantly more (positive value) or less (negative value) abundant compared with controls.  
381 Circle size represents the sum of logCPM.

382

## 383 Discussion

384 We investigated how representatives of two major taxa in the marine environment – *Flavobacteria*  
385 and *Alphaproteobacteria* – react to DOM produced by dinoflagellates. These reactions partly  
386 reflected differences in genomically encoded functional capacity, but also that each of the isolates  
387 changed their allocation of relative transcriptional investment in certain metabolic functions. This  
388 change in transcription coincided with roughly a doubling in abundance following a single hour of  
389 DOM exposure. In agreement with the large phylogenetic distance between the two isolates, there  
390 were striking differences in the gene expression responses to DOM between the two isolates. These  
391 differences were noted even at the top level of the SEED classification system, with for example the



392 ~3-4-fold higher relative expression of *Membrane Transport* in *Brevundimonas* BAL450, and the  
393 ~3-fold higher relative expression of *Fatty Acids, Lipids and Isoprenoids* in *Polaribacter* BAL334  
394 compared to *Brevundimonas* BAL450. This suggests pronounced differences in resource utilization  
395 between these marine bacteria, indicating a potential for resource partitioning at the level of major  
396 metabolic categories.

397 As deduced from the number of genes that differed significantly in expression, we found that  
398 *Polaribacter* BAL334 (total 154 genes; 5.6% of genome) showed a much stronger response to DOM  
399 enrichment than *Brevundimonas* BAL450 (total 39 genes; 1.3% of genome). The responsiveness of  
400 *Polaribacter* BAL334 is in line with findings from the marine environment that flavobacteria have  
401 a pronounced ability to utilize organic matter produced during periods of phytoplankton blooms (31,  
402 32). Moreover, it is noteworthy that the majority of significantly differentially expressed genes in  
403 *Polaribacter* BAL334 were observed in treatments with DOM from exponential phase  
404 dinoflagellates, whereas for *Brevundimonas* BAL450 most significantly expressed genes were found  
405 with stationary phase DOM. The latter observation was consistent with the observation that BAL450  
406 reached higher bacterial abundances when incubated with stationary phase DOM. These findings  
407 imply that bacterial populations have diverged in their adaptation to utilize DOM produced and  
408 released by dinoflagellates during active growth compared to stationary phase. Our findings are  
409 encouraging for the future exploration of ecologically relevant patterns of how different bacterial  
410 taxa respond to and/or transform DOM produced by different phytoplankton species, and in relation  
411 to the physiological status of the phytoplankton as it differs across bloom development phases.

412 There were pronounced differences in which transporter genes the two bacteria expressed. For  
413 example, *Brevundimonas* BAL450 uniquely expressed a number of  $Na^+ H^+$  antiporters (involved  
414 in pH and/or salinity adaptation (33)) and secretion system transporters (involved in adhesion, e.g.  
415 to algal cells (34)). Curiously, one of the most highly expressed genes in *Polaribacter* BAL334 was  
416 a transporter for phosphonate (also expressed in *Brevundimonas* BAL450 but at lower levels).

417 Phosphonate is an organic form of phosphorus which can be used as a sole source of phosphorus by  
418 some microorganisms, allowing them higher fitness under phosphorus limiting conditions (35-37).  
419 It is estimated that phosphonate constitutes a large fraction (5-25%) of the dissolved organic  
420 phosphorus (DOP) in the oceans (38). During phosphate depletion in phytoplankton blooms, ABC-  
421 type phosphonate transporters proteins typically increase in abundance in some bacterial taxa (32).  
422 Genes involved in phosphonate utilization are thus candidates to act as sensors for phosphate status  
423 in marine environments, complementing genes involved in phosphate utilization (e.g. phosphate  
424 membrane transporters and alkaline phosphatase) (39).

425 In the two model bacteria studied here, we found that the expression of *Ton and Tol transport*  
426 *systems* were dominant in both transcript abundance and in number of expressed genes. This class  
427 of transporters is found in the outer membrane of gram-negative bacteria and is involved in the  
428 uptake of a broad set of macromolecules, such as siderophores for iron, vitamin B<sub>12</sub>, nickel  
429 complexes and poly- or oligomeric carbohydrates (40). Since DOM produced by phytoplankton can  
430 be rich in polysaccharides amenable to utilization by bacteria (41), expression of transporters for  
431 this type of compounds can be expected. It is particularly intriguing that we found so many different  
432 genes involved in the Ton and Tol systems expressed, as this is consistent with the uptake of not just  
433 a few preferred molecules, but the simultaneous uptake of a wide array of compounds exuded by  
434 phytoplankton. The characterization of sets of transporters in greater detail thus has the potential to  
435 provide deeper understanding of bacterial DOM metabolism along the progression of phytoplankton  
436 blooms.

437 Interestingly, *Polaribacter* BAL334 also had higher relative expression of genes involved in the  
438 subsystems *Fatty acid metabolism cluster* and *Polyhydroxybutyrate metabolism* (**Fig. 3; Table S1**).  
439 PHB is produced by diverse bacteria in response to physiological stress or carbon excess (42). The  
440 carbon stored in PHB can be used later as an energy source or as anabolic building blocks in times  
441 of low availability of DOM (42). Interestingly, another flavobacterium, *Dokdonia* sp. MED134, has

442 earlier been seen to express genes for a different carbon storage molecule – glycogen – under  
443 conditions where two strains of proteobacteria expressed genes for PHB synthesis (43). *Polaribacter*  
444 BAL334 encodes both pathways and the carbon storage strategy hence appears to not only reflect  
445 phylogenetic relatedness but also temporary ecological factors such as the composition of available  
446 substrates.

447 Even at the highest level of the SEED hierarchy, two categories stood out being exclusively  
448 expressed by just one of the two isolates: *Motility and Chemotaxis* in *Brevundimonas* BAL450 and  
449 *Photosynthesis* in *Polaribacter* BAL334 (**Fig. 2B**). Genome analysis showed that *Polaribacter*  
450 BAL334 lacks the full complement of flagellar motility (it uses gliding motility for movement) (44).  
451 In contrast, the flagellar motility system is present in *Brevundimonas* BAL450 where it was highly  
452 expressed. At the top level SEED (**Fig. 2B**), motility and chemotaxis gene expression was  
453 particularly high in the treatments with dinoflagellate DOM as compared to controls. This could  
454 potentially relate to the cells sensing increased nutrient availability in the DOM treatments or that  
455 the DOM provided energy that fueled increased swimming (45). The *Photosynthesis* genes  
456 expressed by *Polaribacter* BAL334 are those encoding the energy-generating proteorhodopsin  
457 photosystem, which *Brevundimonas* BAL450 lacks. Strikingly, the two differentially abundant  
458 genes in proteorhodopsin synthesis were expressed at higher relative values in the controls than in  
459 the treatments with DOM. Proteorhodopsin is known to help bacterial cells to survive during  
460 starvation (46) or even contribute to growth at low DOC availability (47). This suggests that  
461 *Polaribacter* BAL334 used the proteorhodopsin for surviving in the no-substrate controls, and when  
462 provided with DOM in the treated samples preferentially utilized DOM rather than  
463 photoheterotrophy for its energy demand.

464 The relative expression responses we observed between bacterial species, and between DOM from  
465 two different dinoflagellate growth phases, helped identify genes potentially involved in shaping the  
466 ecology of heterotrophic marine microbes. Our findings emphasize the potential usefulness of

467 experimental approaches for identifying indicator genes for different environmental conditions that  
468 are informative of mechanisms underlying important dynamics of carbon and nutrient fluxes in  
469 marine ecosystems. Our findings have implications for metatranscriptome analysis, since sequences  
470 taken from a community of phylogenetically diverse populations will likely blur signals of  
471 biogeochemical relevance because of differences in functional capacity and lifestyles between  
472 species. Separation of taxa based on taxonomic annotation before analysis of differentially abundant  
473 genes has been proposed to resolve this issue (48). Attaining sufficient precision in the identification  
474 of species – for example through the use of metagenomic assembled genomes (MAGs) (49, 50) –  
475 would allow the use of the genetic responses of particular species of marine bacteria sampled in  
476 natural environments as “living sensors”.

477

## 478 **Funding**

479 The research was supported by the BONUS BLUEPRINT project, which has received funding from  
480 BONUS, the joint Baltic Sea research and development programme (Art 185) and the Swedish  
481 research council FORMAS. This study was also funded by the strategic research environment  
482 EcoChange. The funders had no role in study design, data collection and analysis, decision to  
483 publish, or preparation of the manuscript.

484

## 485 **Acknowledgments**

486 We thank Sabina Arnautovic for skillful technical assistance. Computations were performed on  
487 resources provided by the Swedish National Infrastructure for Computing (SNIC) through the  
488 Uppsala Multidisciplinary Center for Advanced Computational Science (UPPMAX) under project  
489 SNIC 2017/7-419. DNA sequencing was conducted at the Swedish National Genomics  
490 Infrastructure (NGI) at Science for Life Laboratory (SciLifeLab) in Stockholm.

491

492 **Author contributions**

493 JP, MAM and CMGO conceived the study. CMGO and CK performed the experiment. Laboratory  
494 work was done by CMGO and CK with help from JET. DL and CMGO did the bioinformatics.  
495 CMGO, DL, MAM and JP wrote the article.

496

497 **References**

498

- 499 1. Hansell D, Carlson C, Repeta D, Schlitzer R. Dissolved organic matter in the ocean: A  
500 controversy stimulates new insights. *Oceanography*. 2009;22(4):202-11.
- 501 2. Repeta DJ. Chemical Characterization and cycling of Dissolved Organic Matter In: Hansell  
502 DA, Carlson CA, editors. *Biogeochemistry of marine dissolved organic matter*. Second  
503 Edition ed: Academic Press, pp 22-58; 2014.
- 504 3. Dittmar T. Reasons behind the long-term stability of dissolved organic matter In: Hansell  
505 DA, Carlson CA, editors. *Biogeochemistry of marine dissolved organic matter*: Academic  
506 Press, pp 369-385; 2014.
- 507 4. Baines BS, Pace ML. The production of dissolved organic matter by phytoplankton and its  
508 importance to bacteria: Patterns across marine and freshwater systems. *Limnol Oceanogr*.  
509 1991;36(6):1078-90.
- 510 5. Cole JJ, Findlay S, Pace ML. Bacterioplankton production in fresh and saltwater ecosystems:  
511 a cross-system overview. *Mar Ecol Prog Ser*. 1988;43:1-10.
- 512 6. Azam F, Fenchel T, Field JG, Gray JS, Meyer-Reil LA, Thingstad F. The ecological role of  
513 water-column microbes in the sea. *Mar Ecol Prog Ser*. 1983;10:257-63.
- 514 7. Bar-On YM, Phillips R, Milo R. The biomass distribution on Earth. *P Natl Acad Sci USA*.  
515 2018;115(25):6506-11.

- 516 8. Poretsky RS, Sun SL, Mou XZ, Moran MA. Transporter genes expressed by coastal  
517 bacterioplankton in response to dissolved organic carbon. *Environ Microbiol.*  
518 2010;12(3):616-27.
- 519 9. McCarren J, Becker JW, Repeta DJ, Shi Y, Young CR, Malmstrom RR, et al. Microbial  
520 community transcriptomes reveal microbes and metabolic pathways associated with  
521 dissolved organic matter turnover in the sea. *P Natl Acad Sci USA.* 2010;107(38):16420-7.
- 522 10. Beier S, Rivers AR, Moran MA, Obernosterer I. The transcriptional response of prokaryotes  
523 to phytoplankton-derived dissolved organic matter in seawater. *Environ Microbiol.*  
524 2015;17(10):3466-80.
- 525 11. Ferrer-González FX, Widner B, Holderman NR, Glushka J, Edison AS, Kujawinski EB, et  
526 al. Resource partitioning of phytoplankton metabolites that support bacterial heterotrophy.  
527 *ISME J.* 2020;Accepted.
- 528 12. Hellebust JA. Excretion of some organic compounds by marine phytoplankton. *Limnol*  
529 *Oceanogr.* 1965;10(2):192-206.
- 530 13. Watt WD. Extracellular Release of Organic Matter from Two Freshwater Diatoms. *Ann Bot.*  
531 1969;33(131):427-37.
- 532 14. Mague TH, Friberg E, Hughes DJ, Morris I. Extracellular release of carbon by marine  
533 phytoplankton: A physiological approach. *Limnol Oceanogr.* 1980;25(2):262-79.
- 534 15. Biddanda B, Benner R. Carbon, nitrogen, and carbohydrate fluxes during the production of  
535 particulate and dissolved organic matter by marine phytoplankton. *Limnol Oceanogr*  
536 1997;42(3):506-18.
- 537 16. Azam F, Malfatti F. Microbial structuring of marine ecosystems. *Nat Rev Microbiol.*  
538 2007;5(10):782-91.
- 539 17. Guillard RRL, Hargraves PE. *Stichochrysis immobilis* is a diatom, not a chrysophyte.  
540 *Phycologia.* 1993;32(3):234-6.

- 541 18. Jespersen A-M, Christoffersen K. Measurement of chlorophyll a from phytoplankton using  
542 ethanol as an extraction solvent. *Arch Hydrobiol.* 1987;109(3):445-54.
- 543 19. Andrews S. FastQC: a quality control tool for high throughput sequence data  
544 <http://www.bioinformatics.babraham.ac.uk/projects/fastqc2010> [Available from:  
545 <http://www.bioinformatics.babraham.ac.uk/projects/fastqc>.
- 546 20. Ewels P, Magnusson M, Lundin S, Kaller M. MultiQC: summarize analysis results for  
547 multiple tools and samples in a single report. *Bioinformatics.* 2016;32(19):3047-8.
- 548 21. Martin M. Cutadapt removes adapter sequences from high-throughput sequencing reads.  
549 *EMBnetjournal.* 2011;17(1):10-2.
- 550 22. Joshi NA, Fass JN. Sickle: A sliding-window, adaptive, quality-based trimming tool for  
551 FastQ files (Version 1.33). <https://github.com/najoshi/sickle2011> [
- 552 23. Li D, Liu CM, Luo R, Sadakane K, Lam TW. MEGAHIT: an ultra-fast single-node solution  
553 for large and complex metagenomics assembly via succinct de Bruijn graph. *Bioinformatics.*  
554 2015;31(10):1674-6.
- 555 24. Aziz RK, Bartels D, Best AA, DeJongh M, Disz T, Edwards RA, et al. The RAST Server:  
556 rapid annotations using subsystems technology. *Bmc Genomics.* 2008;9:75.
- 557 25. Overbeek R, Olson R, Pusch GD, Olsen GJ, Davis JJ, Disz T, et al. The SEED and the rapid  
558 annotation of microbial genomes using subsystems technology (RAST). *Nucleic Acids Res.*  
559 2014;42(Database issue):D206-14.
- 560 26. Giorgio PAd, Bird DF, Prairie YT, Planas D. Flow cytometric determination of bacterial  
561 abundance in lake plankton with the green nucleic acid stain SYTO 13. *Limnol Oceanogr.*  
562 1996;41(4):783-9.
- 563 27. Markussen T, Happel EM, Teikari JE, Huchaiah V, Alneberg J, Andersson AF, et al.  
564 Coupling biogeochemical process rates and metagenomic blueprints of coastal bacterial  
565 assemblages in the context of environmental change. *Environ Microbiol.* 2018;20(8):3083-  
566 99.

- 567 28. Langmead B, Salzberg SL. Fast gapped-read alignment with Bowtie 2. *Nat Methods*.  
568 2012;9(4):357-9.
- 569 29. Robinson MD, McCarthy DJ, Smyth GK. edgeR: a Bioconductor package for differential  
570 expression analysis of digital gene expression data. *Bioinformatics*. 2010;26(1):139-40.
- 571 30. Grondin JM, Tamura K, Déjean G, Abbott DW, Brumer H. Polysaccharide utilization loci:  
572 fueling microbial communities. *J Bacteriol*. 2017;199:e00860-16.
- 573 31. Pinhassi J, Sala MM, Havskum H, Peters F, Guadayol O, Malits A, et al. Changes in  
574 bacterioplankton composition under different phytoplankton regimens. *Appl Environ*  
575 *Microb*. 2004;70(11):6753-66.
- 576 32. Teeling H, Fuchs BM, Becher D, Klockow C, Gardebrecht A, Bennke CM, et al. Substrate-  
577 controlled succession of marine bacterioplankton populations induced by a phytoplankton  
578 bloom. *Science*. 2012;336(6081):608-11.
- 579 33. Padan E, Venturi M, Gerchman Y, Dover N. Na<sup>+</sup>/H<sup>+</sup> antiporters. *Biochimica et Biophysica*  
580 *Acta (BBA) - Bioenergetics*. 2001;1505(1):144-57.
- 581 34. Green ER, Mecsas J. Bacterial Secretion Systems: An Overview. *Microbiol Spectr*.  
582 2016;4(1).
- 583 35. Cook AM, Daughton CG, Alexander M. Phosphonate utilization by bacteria. *J Bacteriol*.  
584 1978;133(1):85-90.
- 585 36. White AK, Metcalf WW. Microbial metabolism of reduced phosphorus compounds. *Annu*  
586 *Rev Microbiol*. 2007;61:379-400.
- 587 37. Teikari JE, Fewer DP, Shrestha R, Hou S, Leikoski N, Makela M, et al. Strains of the toxic  
588 and bloom-forming *Nodularia spumigena* (cyanobacteria) can degrade methylphosphonate  
589 and release methane. *ISME J*. 2018;12(6):1619-30.
- 590 38. Lin S, Litaker RW, Sunda WG. Phosphorus physiological ecology and molecular  
591 mechanisms in marine phytoplankton. *J Phycol*. 2016;52(1):10-36.



- 592 39. Sosa OA, Repeta DJ, DeLong EF, Ashkezari MD, Karl DM. Phosphate-limited ocean  
593 regions select for bacterial populations enriched in the carbon-phosphorus lyase pathway for  
594 phosphonate degradation. *Environ Microbiol.* 2019;21(7):2402-14.
- 595 40. Tang K, Jiao N, Liu K, Zhang Y, Li S. Distribution and functions of TonB-dependent  
596 transporters in marine bacteria and environments: implications for dissolved organic matter  
597 utilization. *Plos One.* 2012;7(7):e41204.
- 598 41. Muhlenbruch M, Grossart HP, Eigemann F, Voss M. Mini-review: Phytoplankton-derived  
599 polysaccharides in the marine environment and their interactions with heterotrophic bacteria.  
600 *Environ Microbiol.* 2018;20(8):2671-85.
- 601 42. Anderson AJ, Dawes EA. Occurrence, metabolism, metabolic role and industrial uses of  
602 bacterial polyhydroxyalkanoates. *Microbiol Rev.* 1990;54(4):450-72.
- 603 43. Muthusamy S, Lundin D, Mamede Branca RM, Baltar F, Gonzalez JM, Lehtio J, et al.  
604 Comparative proteomics reveals signature metabolisms of exponentially growing and  
605 stationary phase marine bacteria. *Environ Microbiol.* 2017;19(6):2301-19.
- 606 44. Nan B. Bacterial Gliding Motility: Rolling Out a Consensus Model. *Curr Biol.*  
607 2017;27(4):R154-R6.
- 608 45. Stocker R, Seymour JR. Ecology and Physics of Bacterial Chemotaxis in the Ocean.  
609 *Microbiol Mol Biol Rev.* 2012;76(4):792-812.
- 610 46. Gómez-Consarnau L, Akram N, Lindell K, Pedersen A, Neutze R, Milton DL, et al.  
611 Proteorhodopsin phototrophy promotes survival of marine bacteria during starvation. *PLoS*  
612 *Biol.* 2010;8:e1000358.
- 613 47. Gómez-Consarnau L, González JM, Coll-Lladó M, Gourdon P, Pascher T, Neutze R, et al.  
614 Light stimulates growth of proteorhodopsin-containing marine Flavobacteria. *Nature.*  
615 2007;445(7124):210-3.
- 616 48. Klingenberg H, Meinicke P. How to normalize metatranscriptomic count data for differential  
617 expression analysis. *PeerJ.* 2017;5:e3859.

- 618 49. Hugerth LW, Larsson J, Alneberg J, Lindh MV, Legrand C, Pinhassi J, et al. Metagenome-  
619 assembled genomes uncover a global brackish microbiome. *Genome Biol.* 2015;16:279.
- 620 50. Alneberg J, Karlsson CMG, Divne AM, Bergin C, Homa F, Lindh MV, et al. Genomes from  
621 uncultivated prokaryotes: a comparison of metagenome-assembled and single-amplified  
622 genomes. *Microbiome.* 2018;6(1):173.

623

624

### 625 **Supplementary table legends**

626 **Table S1.** Expression of genes in the SEED category *Fatty Acids, Lipids, and Isoprenoids* in  
627 *Polaribacter* BAL334 and *Brevundimonas* BAL450. Both the SEED subcategory and subsystem are  
628 shown together with the expression abundance of the gene in counts per million (CPM) and standard  
629 deviation (CPM) in treatments and control. Note that a gene can occur in more than one SEED  
630 category.

631 **Table S2.** Significantly differentially abundant genes in *Polaribacter* BAL334 and *Brevundimonas*  
632 BAL450 with SEED categories and SEED subsystems. Expressed genes were determined to be  
633 significantly more (denoted “up”) or less (denoted “down”) abundant in the transcriptomes of the  
634 DOM-enriched samples compared to controls, using EdgeR statistical analysis. Contrast indicates  
635 whether the gene occurs only in DOM from exponential phase (i.e. Exp-Con) or only in the  
636 stationary phase (i.e. Sta-Con) or is in both (i.e. shared genes). Note that a gene can occur in more  
637 than one SEED category.

638

# Prorocentrum minimum growth

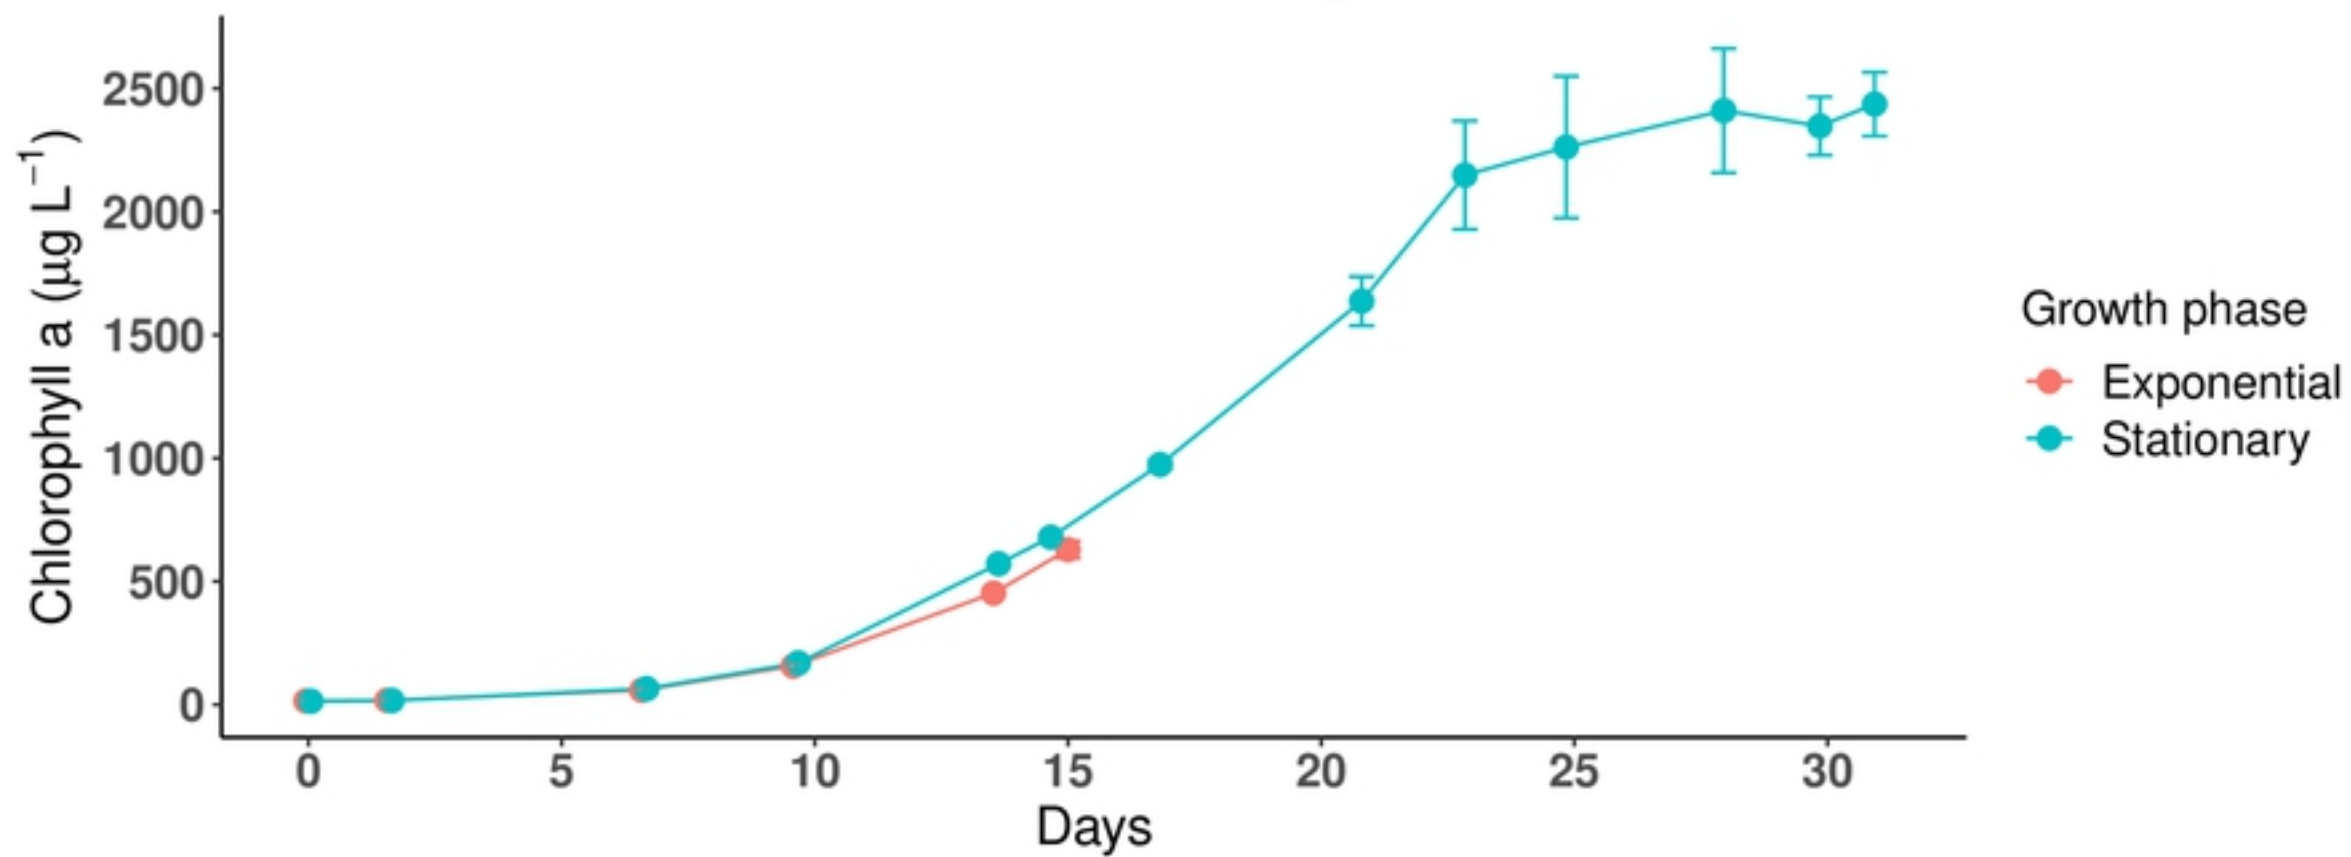

Figure 1

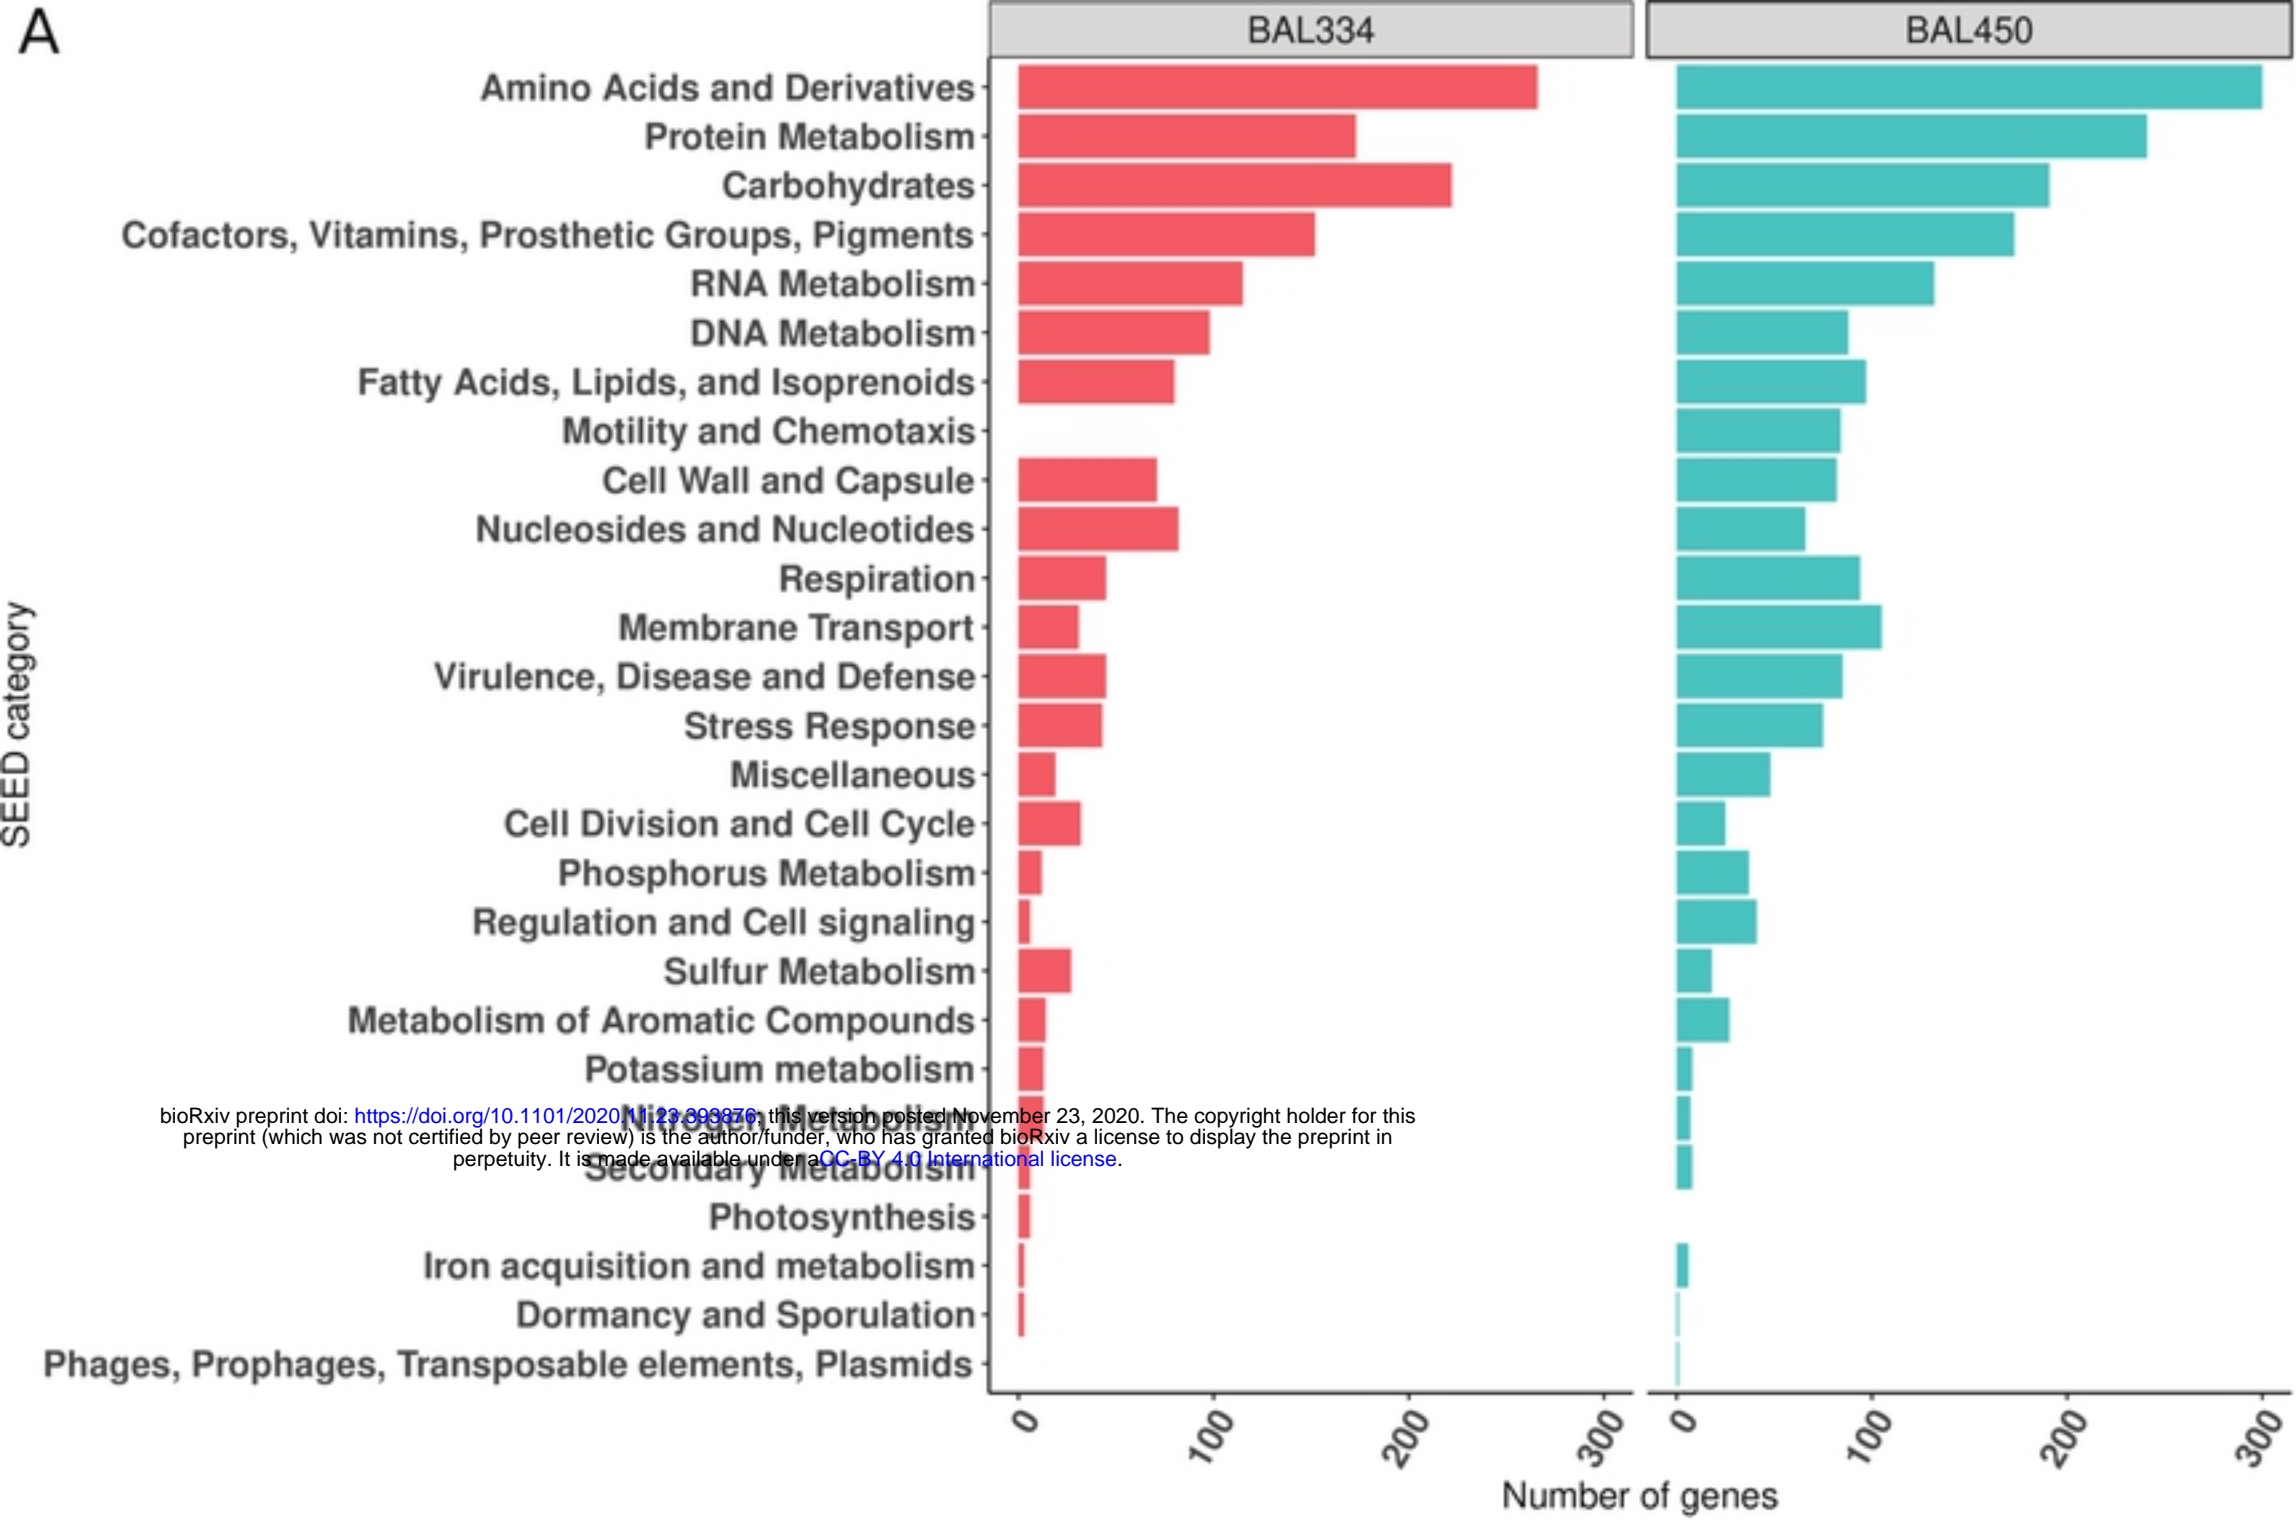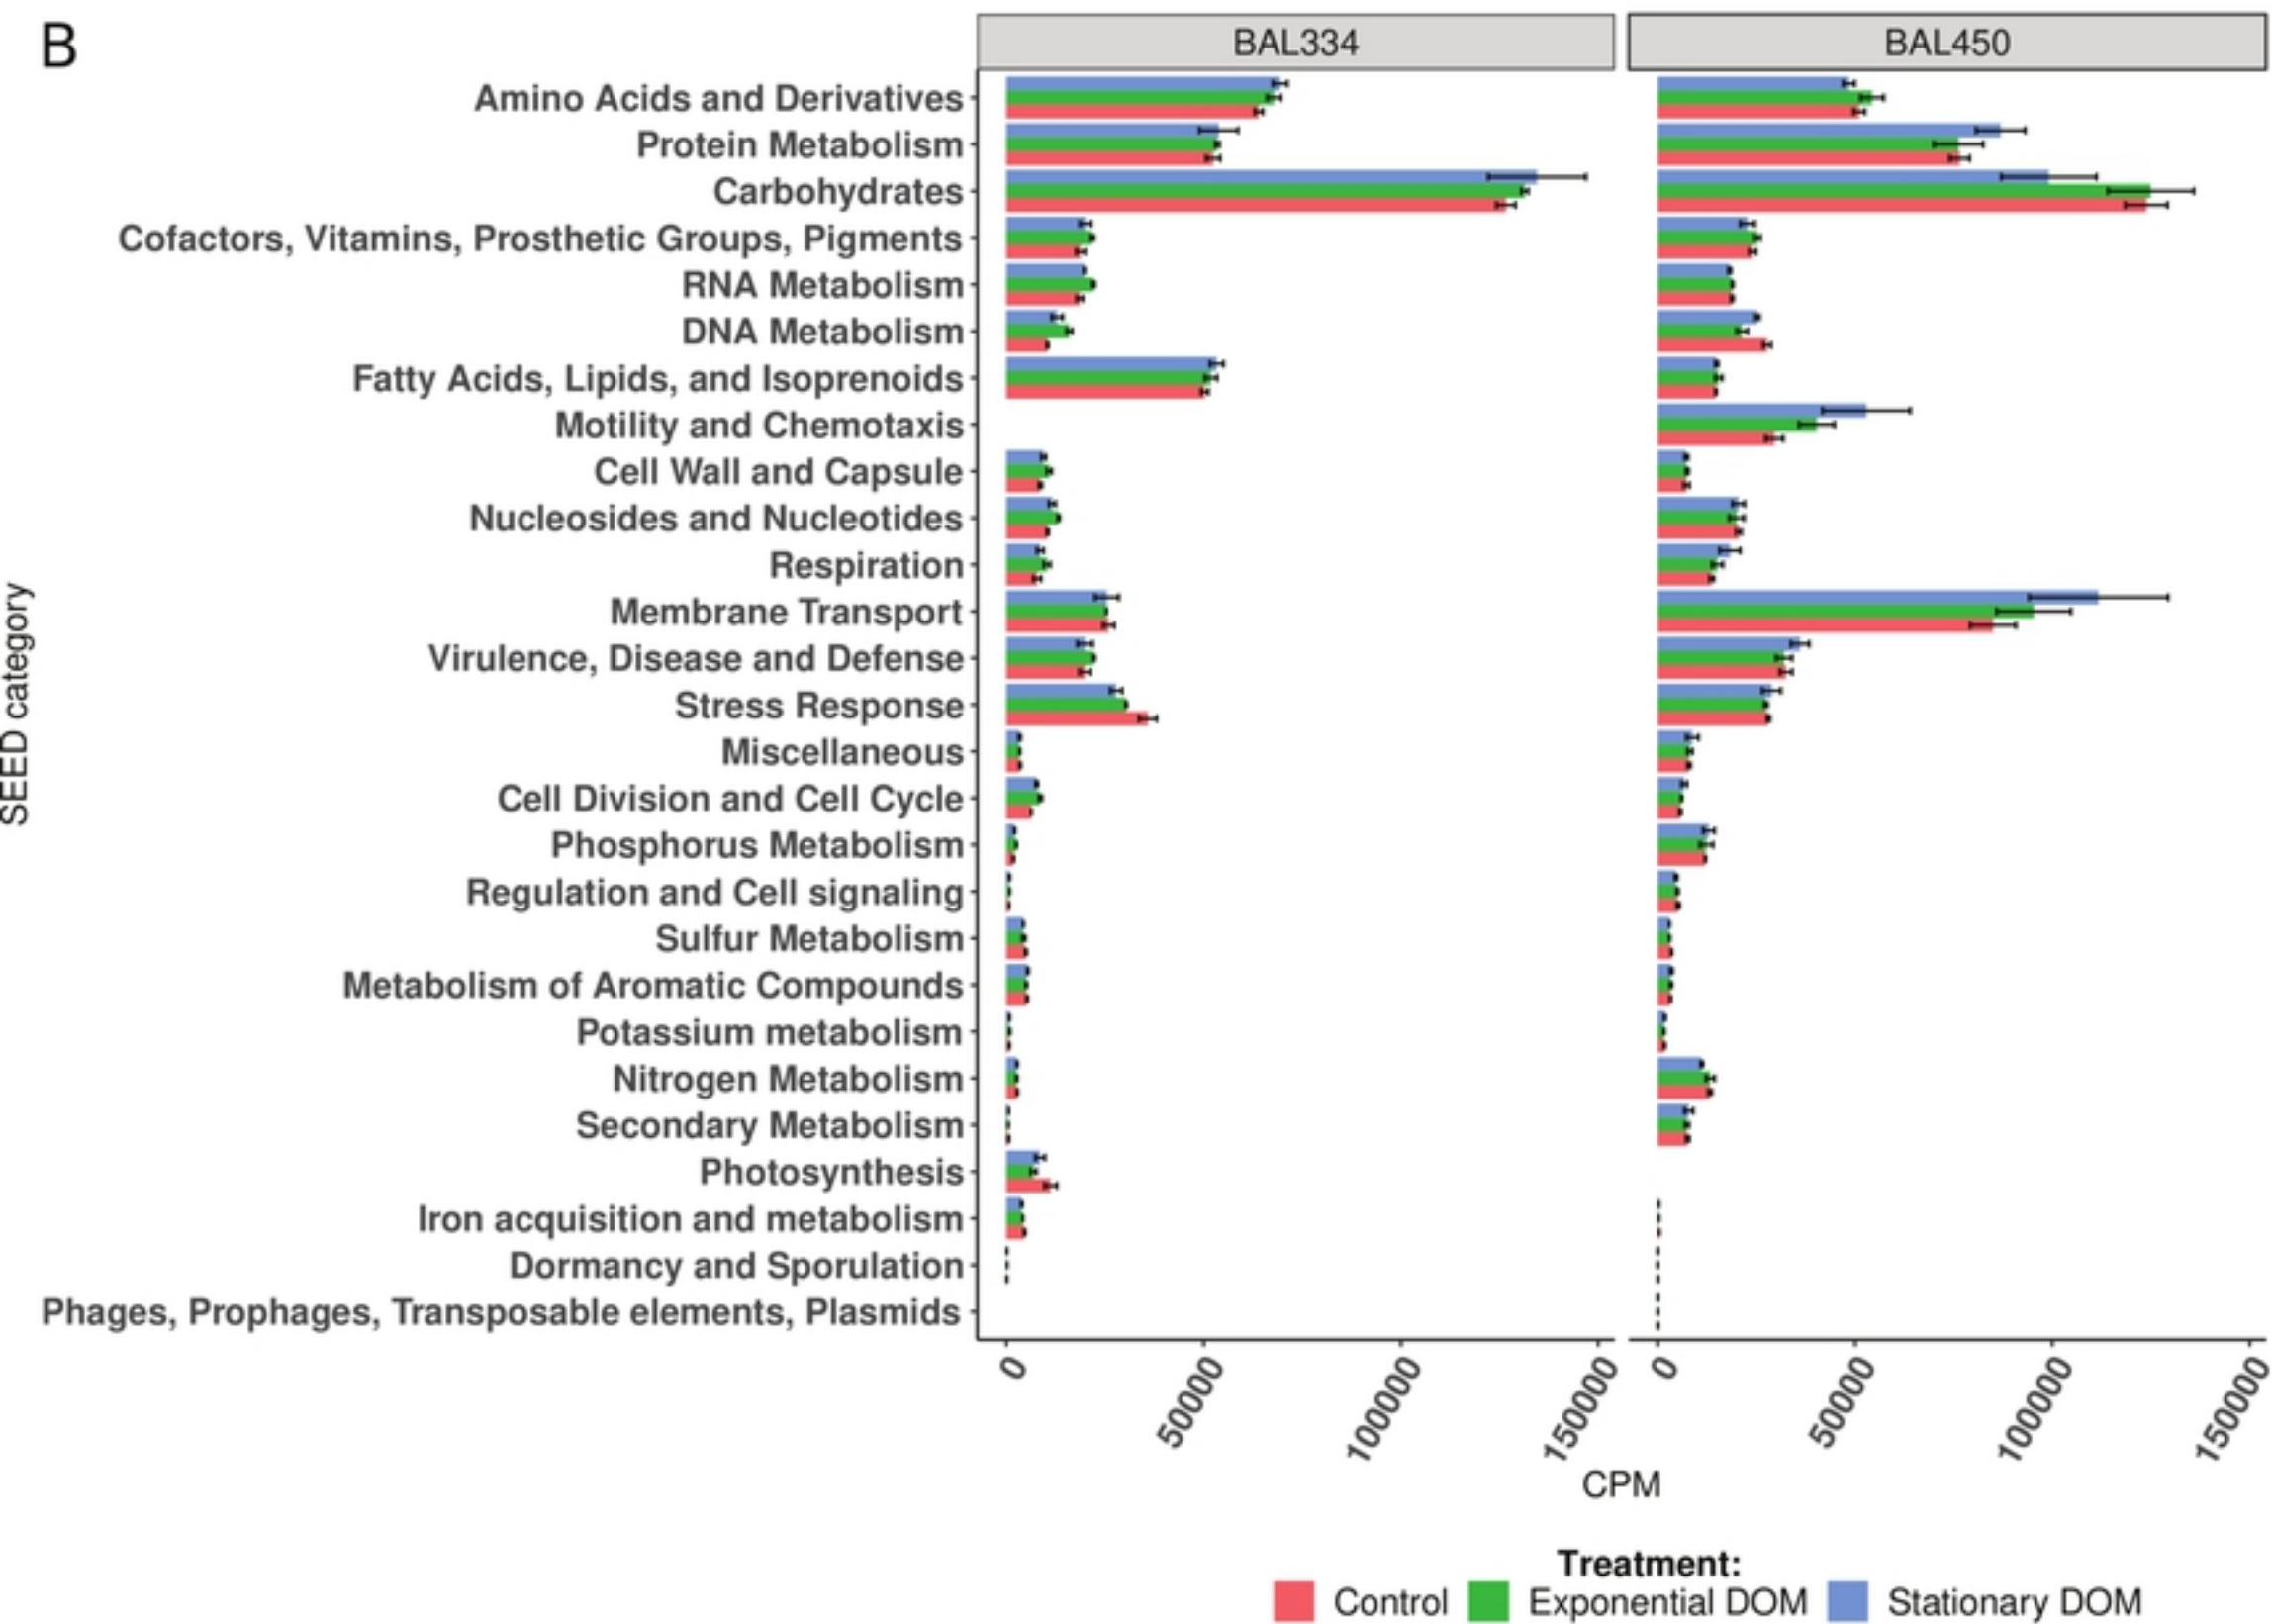

Figure 2

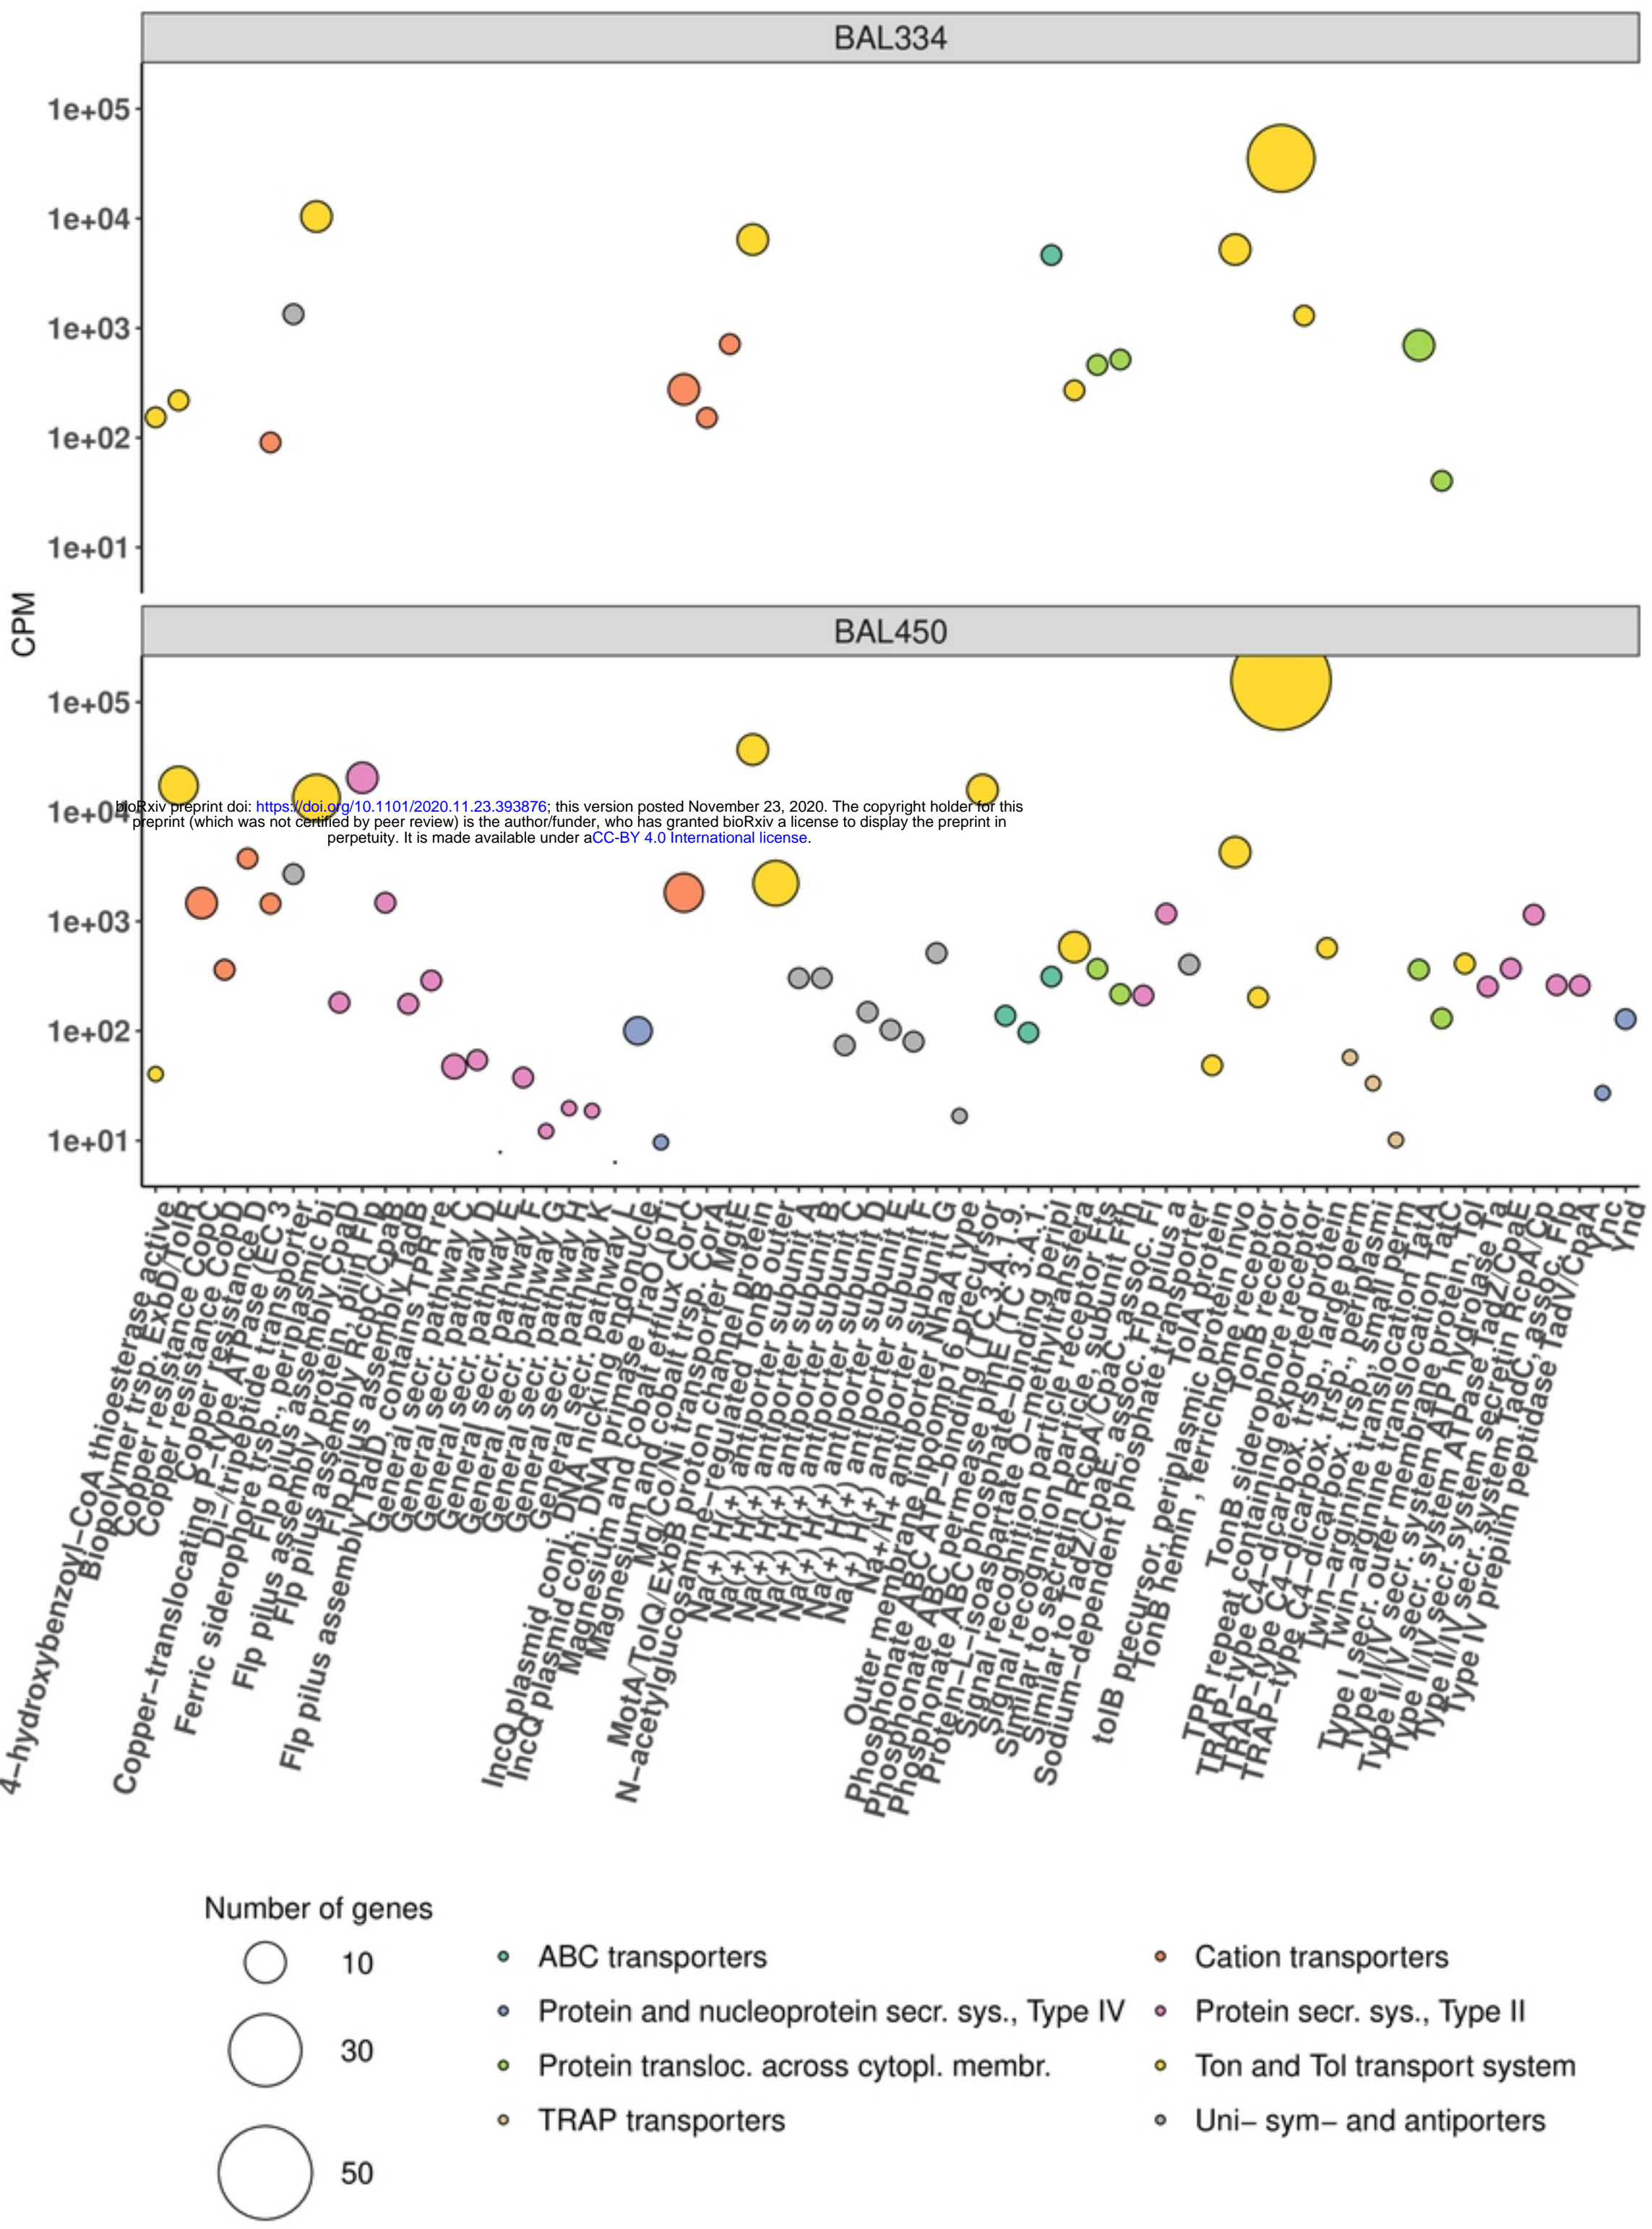

Figure 3

bioRxiv preprint doi: <https://doi.org/10.1101/2020.11.23.393876>; this version posted November 23, 2020. The copyright holder for this preprint (which was not certified by peer review) is the author/funder, who has granted bioRxiv a license to display the preprint in perpetuity. It is made available under aCC-BY 4.0 International license.

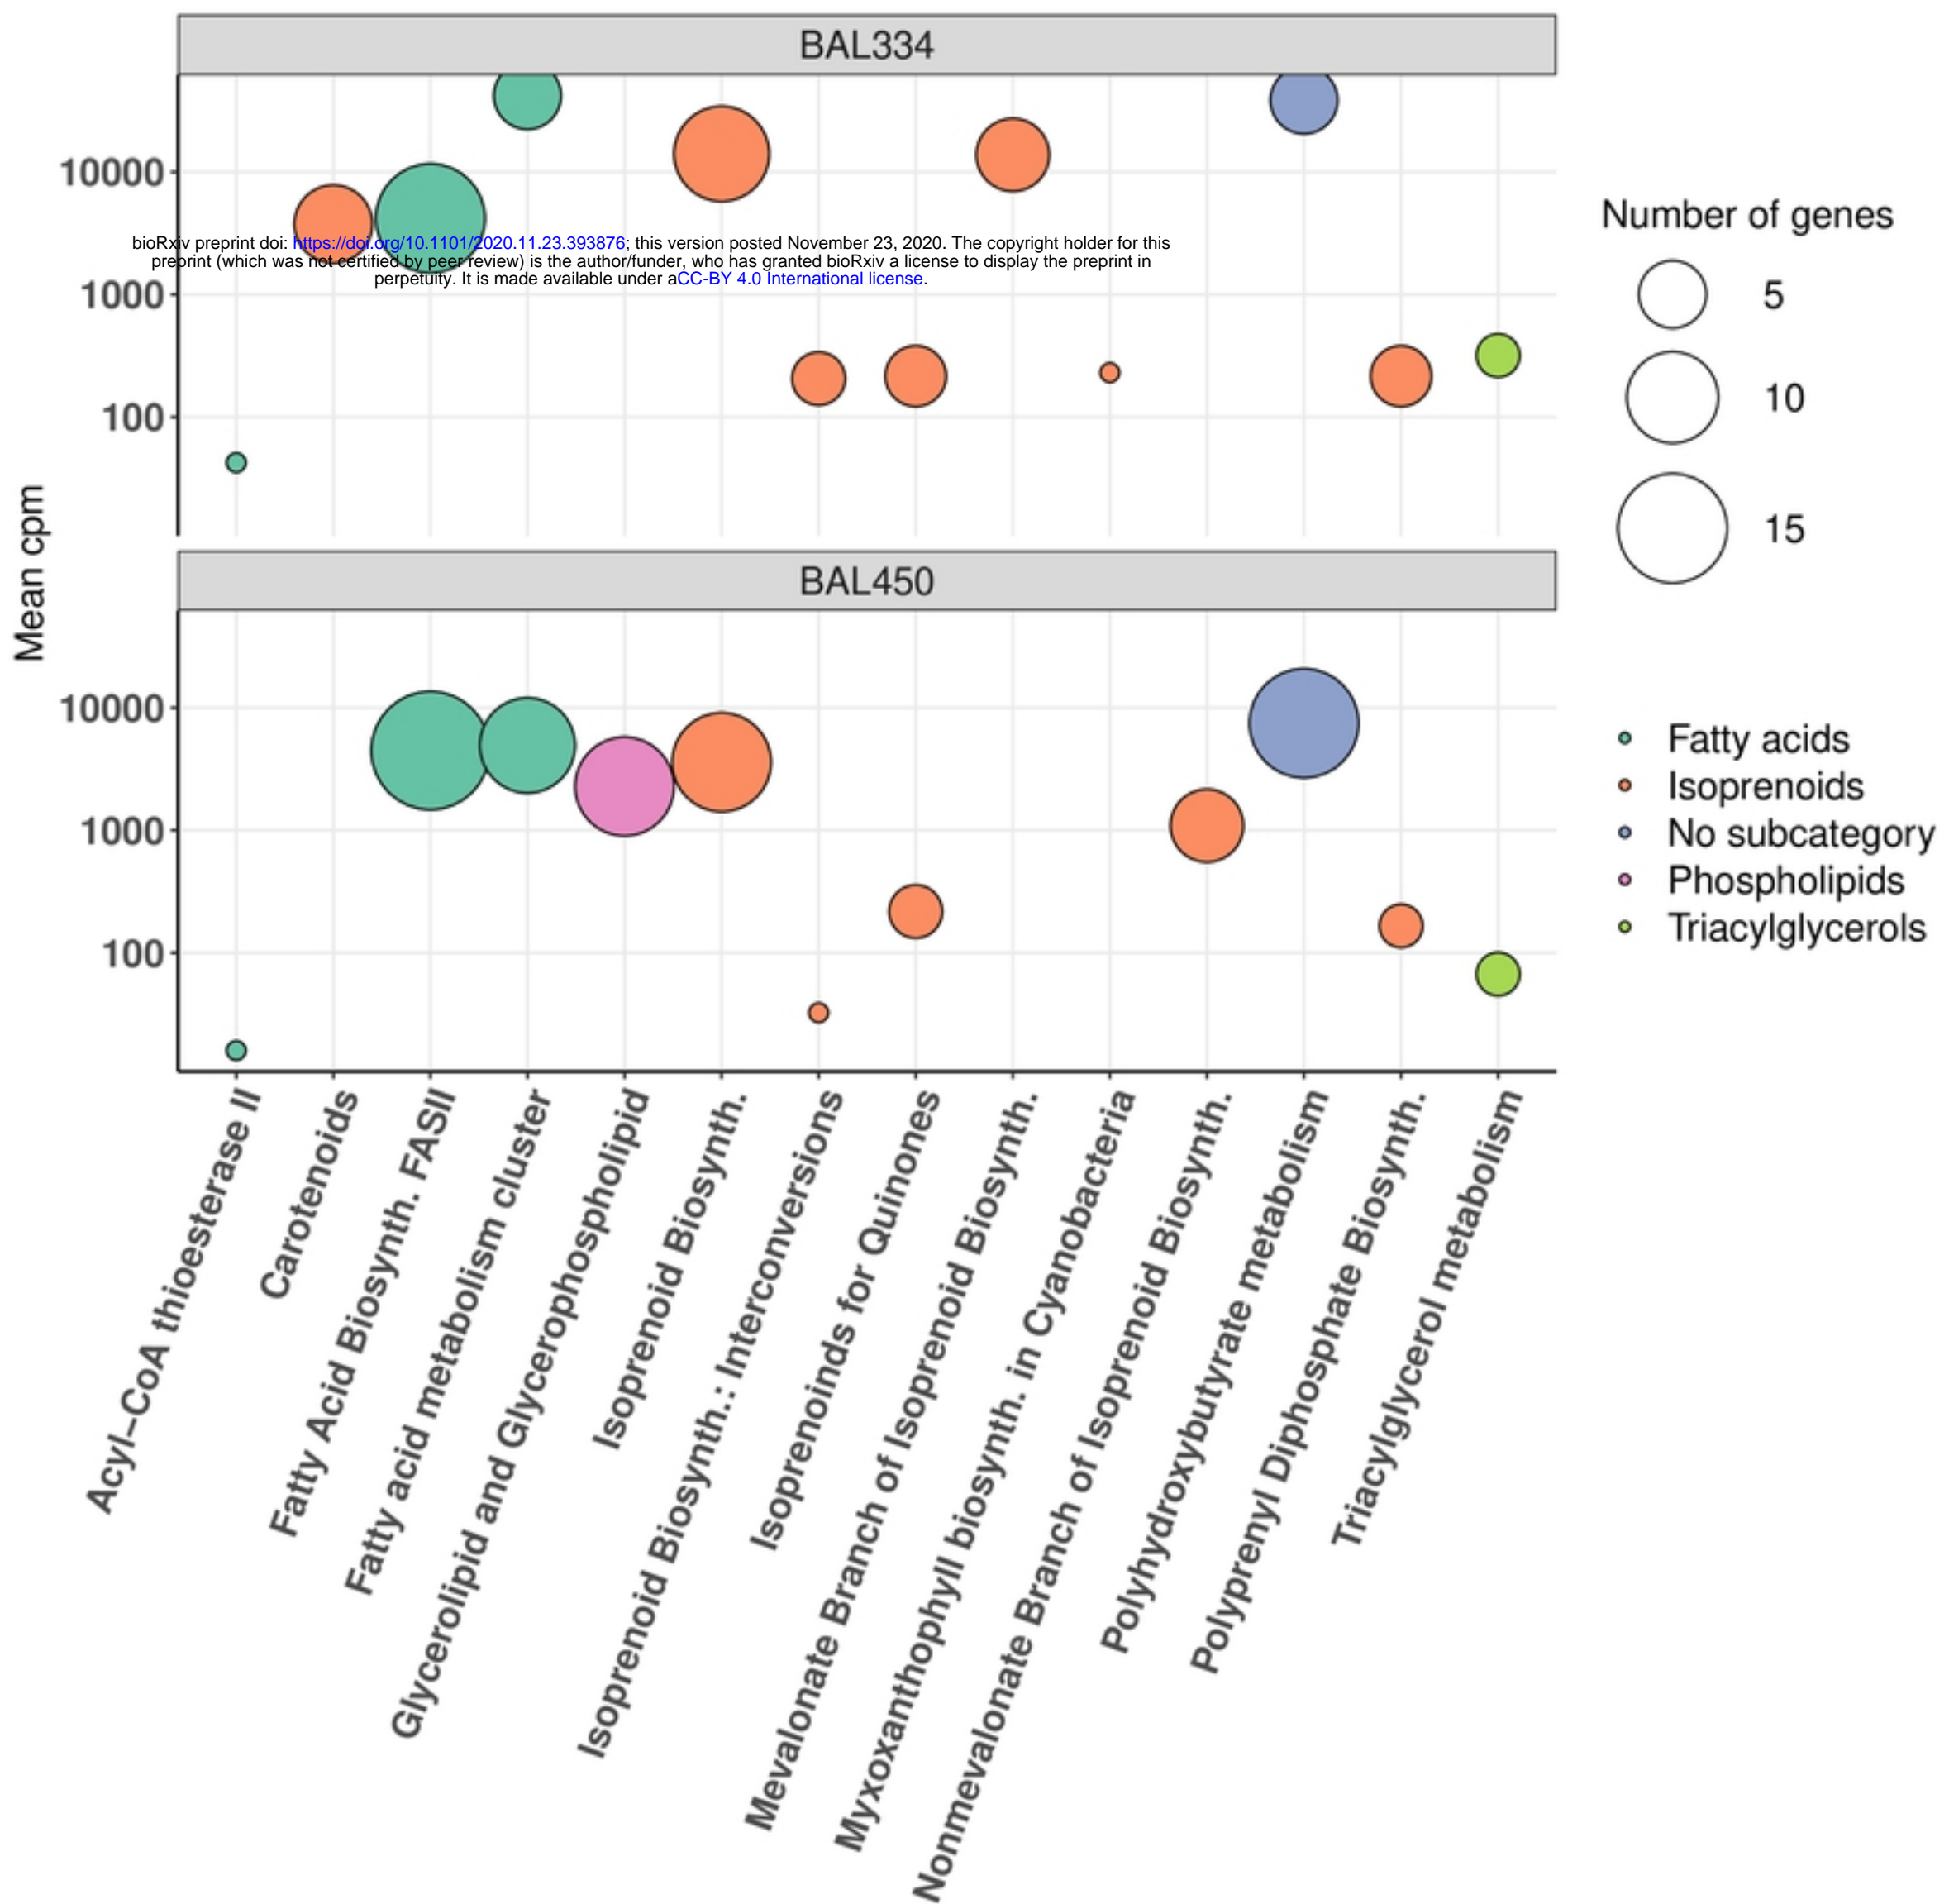

Figure 4

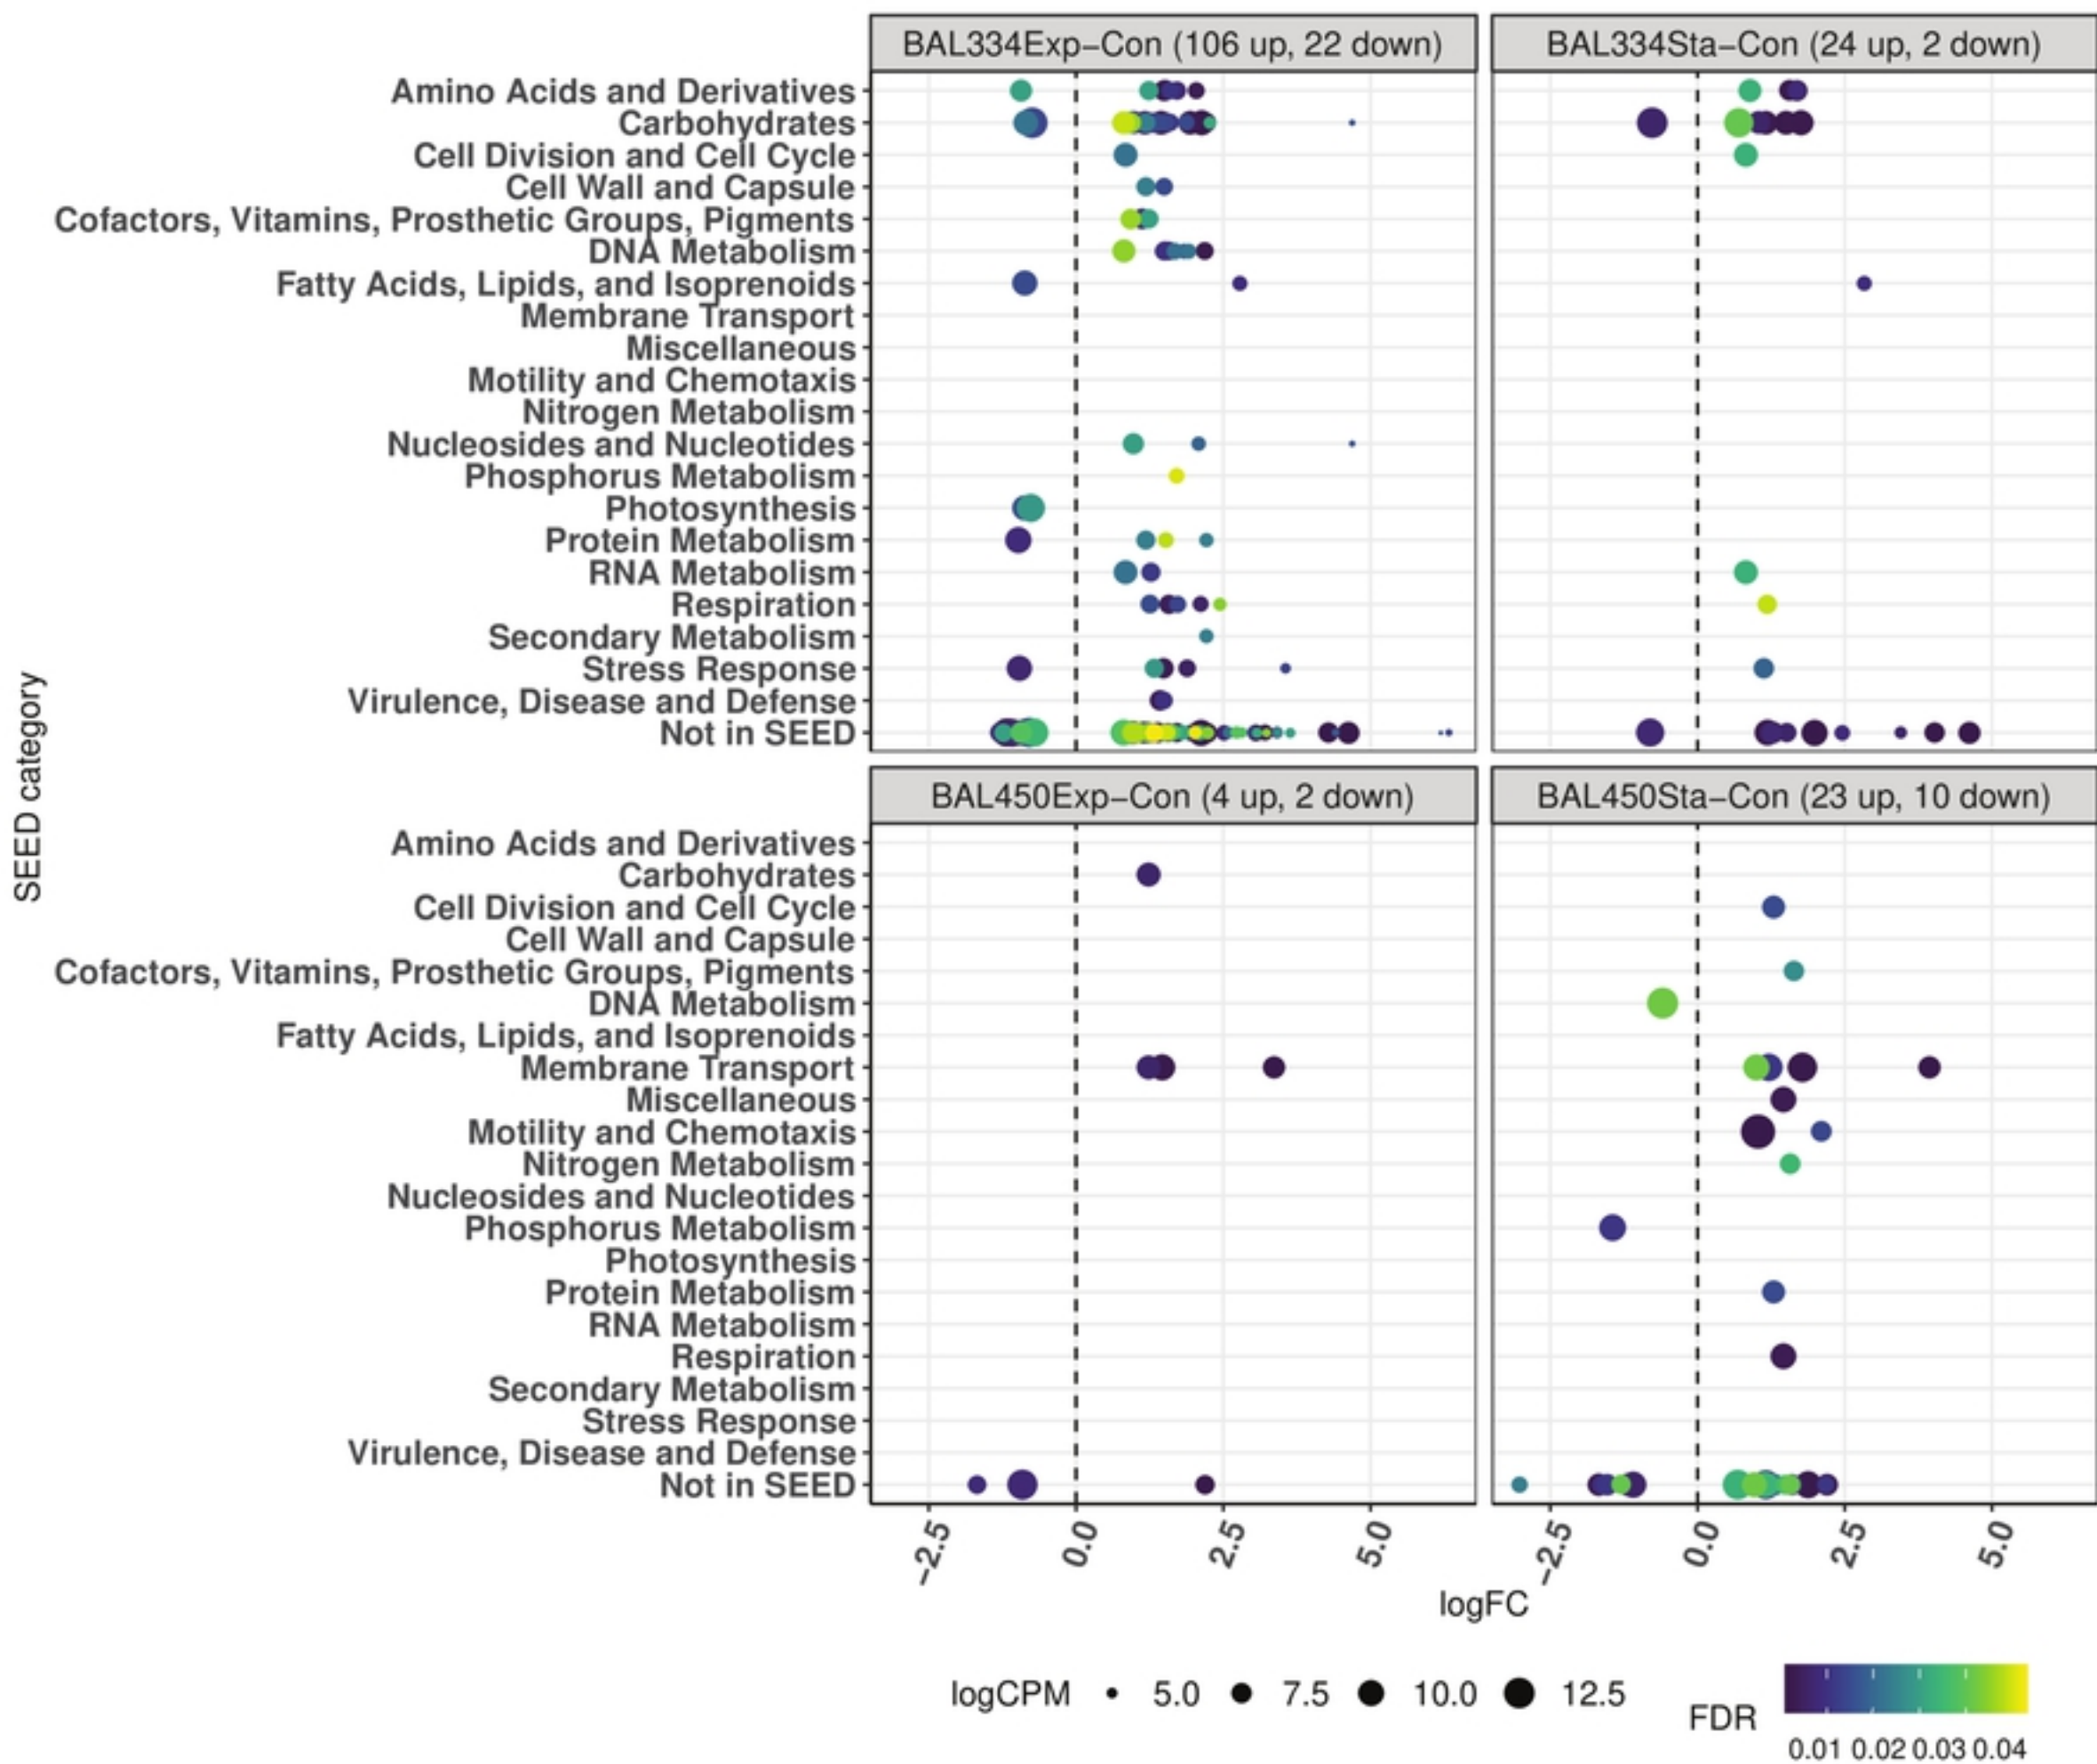

Figure 5

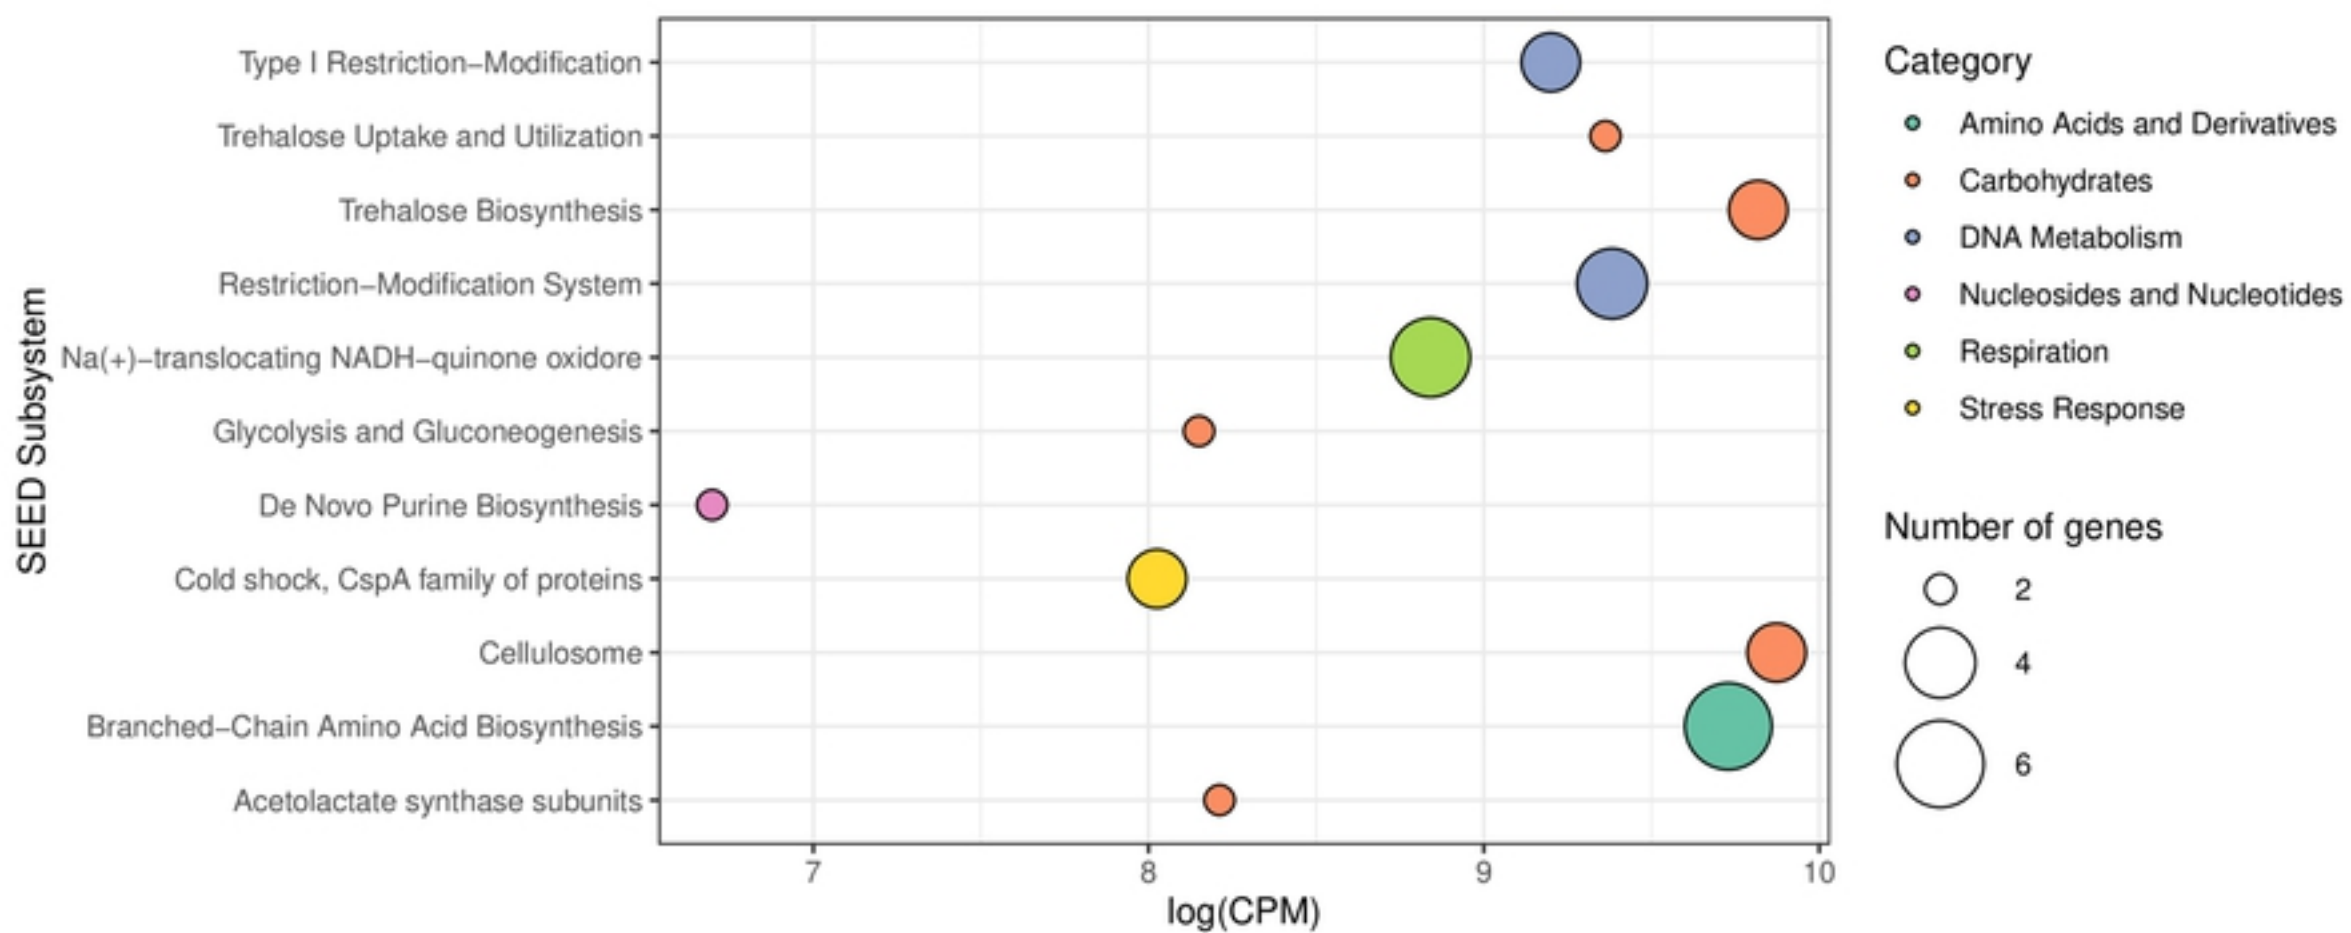

Figure 6
